# Supplementary material for: Distinct patterns of variation in the distribution of knee pain
Source: PubMed Central journal article supplement (PMC6224396; doi:10.1038/s41598-018-34950-2), 2018-11-08
Supplement: 41598_2018_34950_MOESM1_ESM.pdf [file 41598_2018_34950_MOESM1_ESM.pdf]

## **Distinct patterns of variation in the distribution of knee pain**

Shellie A. Boudreau<sup>1,\*</sup>, Albert Cid Royo<sup>1</sup>, Mark Matthews<sup>2,3</sup>, Thomas Graven-Nielsen<sup>1</sup>, Ernest N. Kamavuako<sup>4</sup>, Greg Slabaugh<sup>5</sup>, Kristian Thorborg<sup>6</sup>, Bill Vicenzino<sup>2</sup> and Michael Skovdal Rathleff<sup>7,8</sup>

<sup>1</sup> Center for Neuroplasticity and Pain (CNAP), Department of Health Science and Technology, Aalborg University, Denmark

<sup>2</sup> The University of Queensland, School of Health and Rehabilitation Sciences, Sports Injuries Rehabilitation and Prevention for Health research unit, CCRE Spine, Brisbane, Australia

<sup>3</sup> Sports and Exercise Sciences Research Institute, School of Sport, Ulster University, Belfast, United Kingdom

<sup>4</sup> Center for Robotics Research (CORE), Department of Informatics, King's College London, United Kingdom

<sup>5</sup> Department of Computer Science, City, University of London, United Kingdom

<sup>6</sup> Sports Orthopedic Research Center - Copenhagen (SORC-C), Department of Orthopaedic Surgery, Copenhagen University Hospital, Amager-Hvidovre, Denmark

<sup>7</sup> Research Unit for General Practice in Aalborg, Department of Clinical Medicine, Aalborg University, Denmark

<sup>8</sup> SMI, Department of Health Science and Technology, Aalborg University, Denmark

Figure 1: All individual pain drawings displayed in random order with 9 drawings per page.

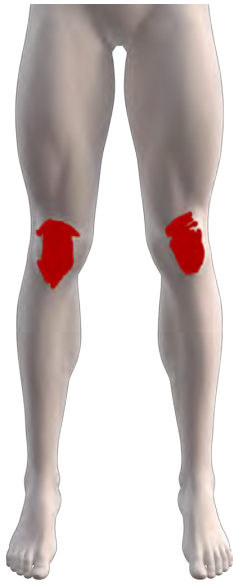

*(a) Subject ID: 1*

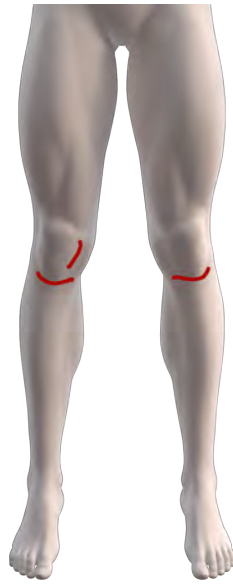

*(b) Subject ID: 2*

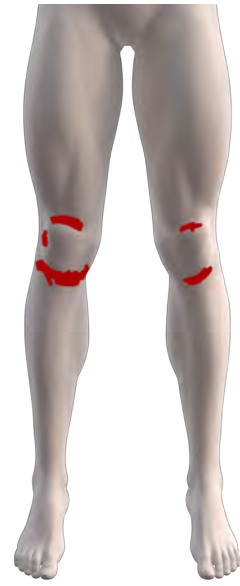

*(c) Subject ID: 3*

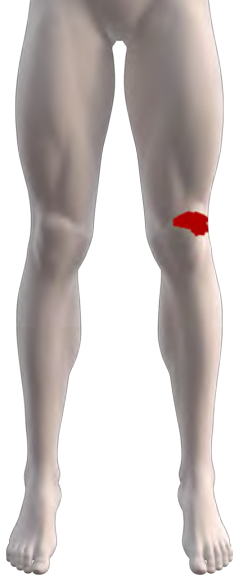

*(d) Subject ID: 4*

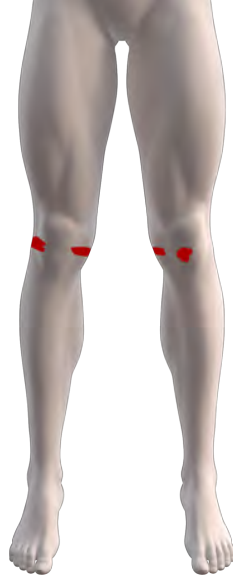

*(e) Subject ID: 5*

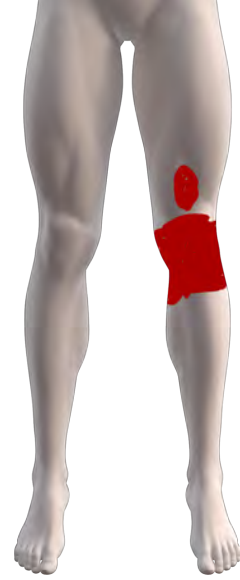

*(f) Subject ID: 6*

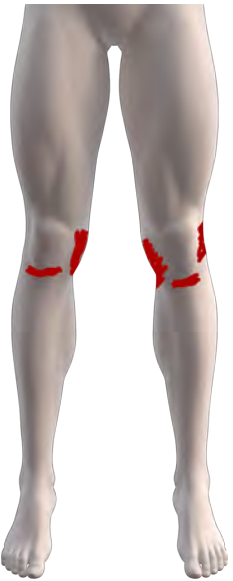

*(g) Subject ID: 7*

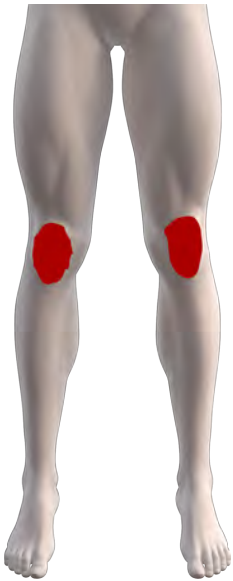

*(h) Subject ID: 8*

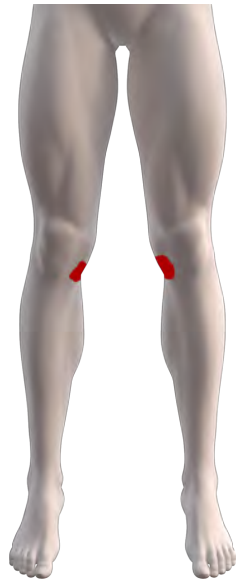

*(i) Subject ID: 9*

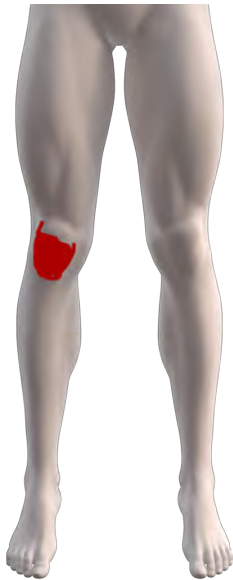

*(a) Subject ID: 10*

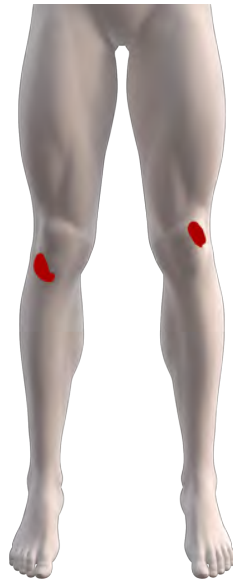

*(b) Subject ID: 11*

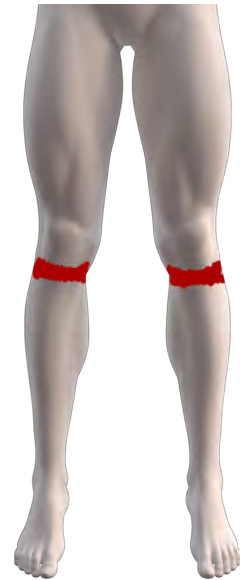

*(c) Subject ID: 12*

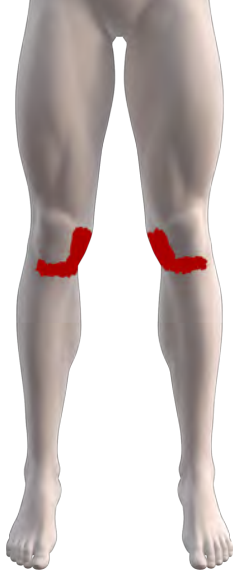

*(d) Subject ID: 13*

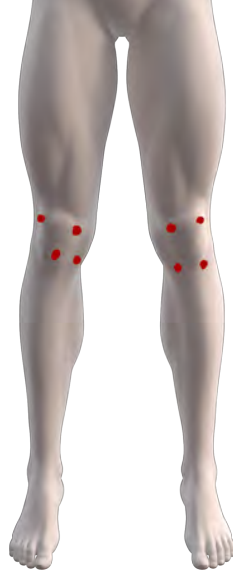

*(e) Subject ID: 14*

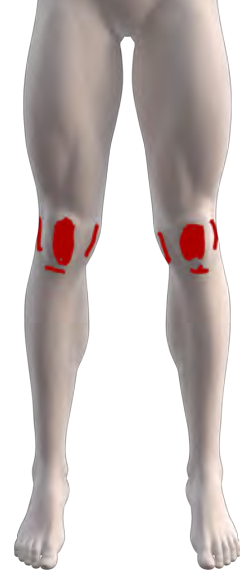

*(f) Subject ID: 15*

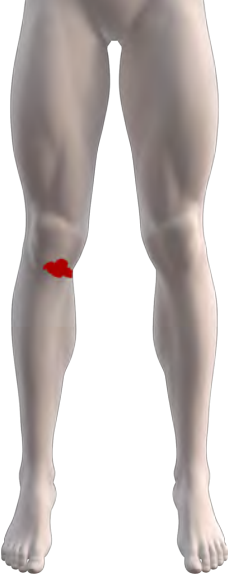

*(g) Subject ID: 16*

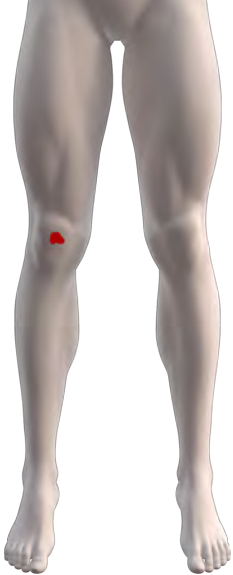

*(h) Subject ID: 17*

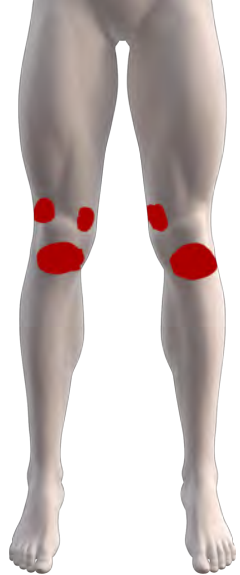

*(i) Subject ID: 18*

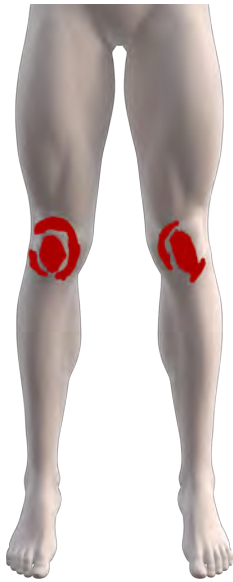

(a) Subject ID: 19

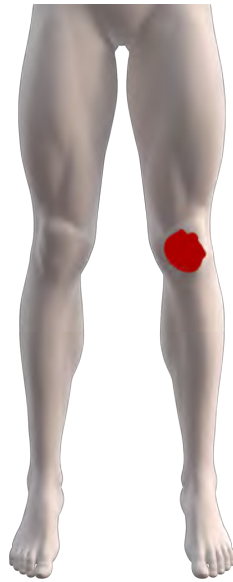

(b) Subject ID: 20

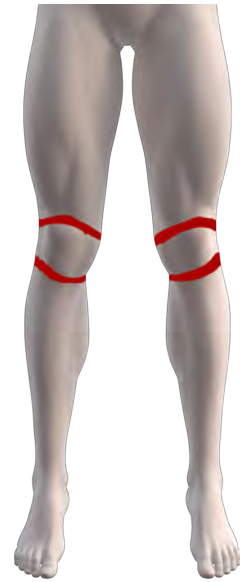

(c) Subject ID: 21

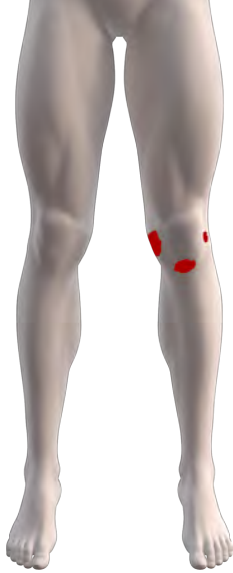

(d) Subject ID: 22

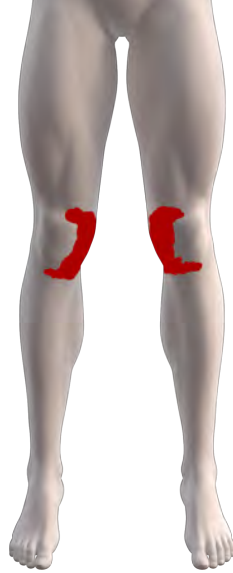

(e) Subject ID: 23

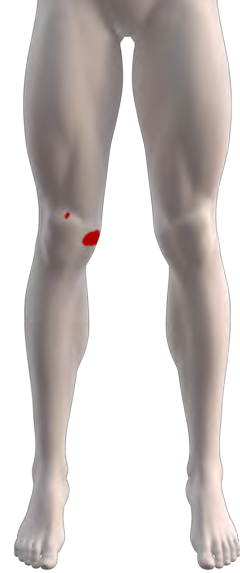

(f) Subject ID: 24

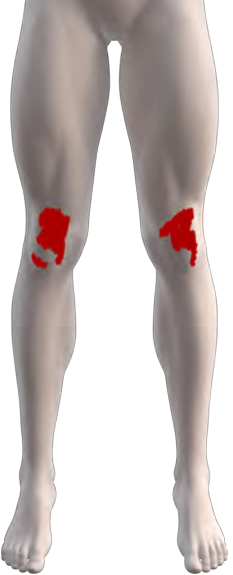

(g) Subject ID: 25

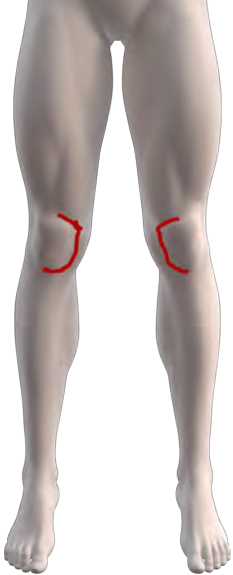

(h) Subject ID: 26

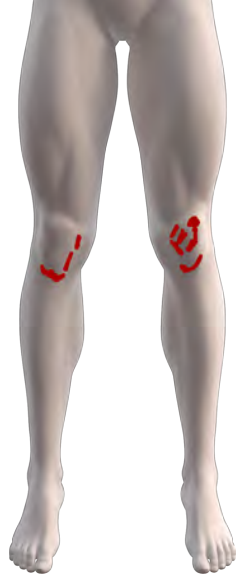

(i) Subject ID: 27

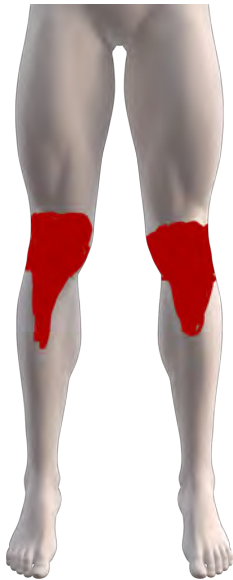

(a) Subject ID: 28

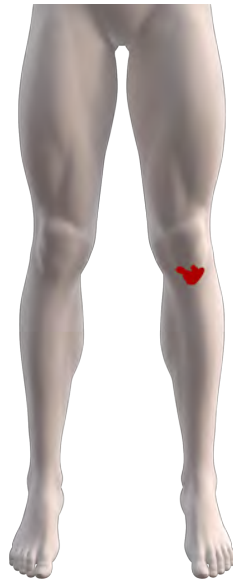

(b) Subject ID: 29

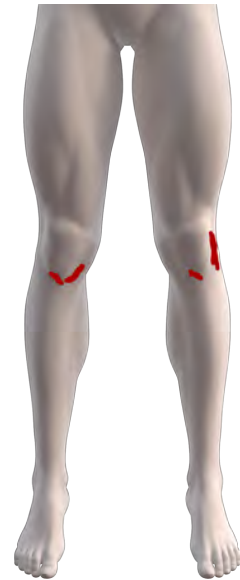

(c) Subject ID: 30

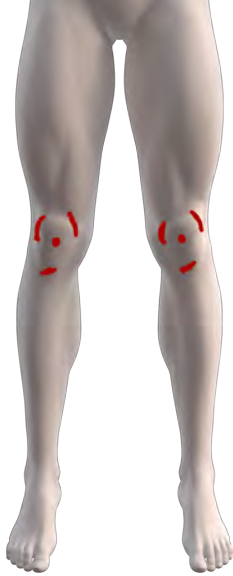

(d) Subject ID: 31

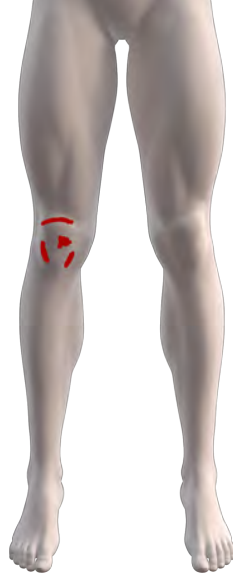

(e) Subject ID: 32

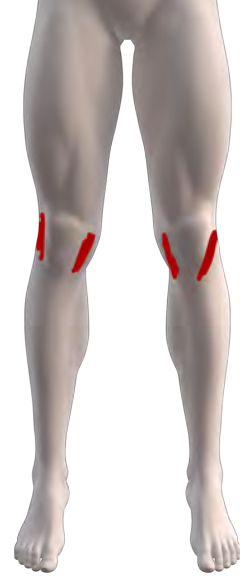

(f) Subject ID: 33

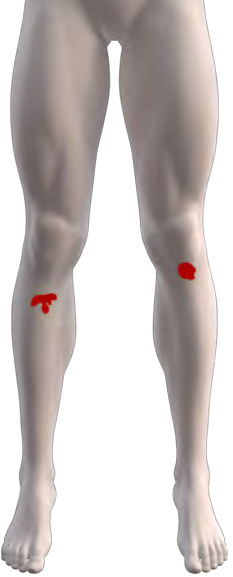

(g) Subject ID: 34

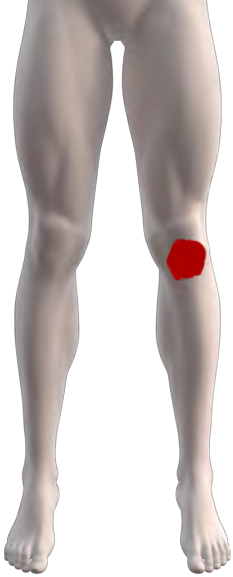

(h) Subject ID: 35

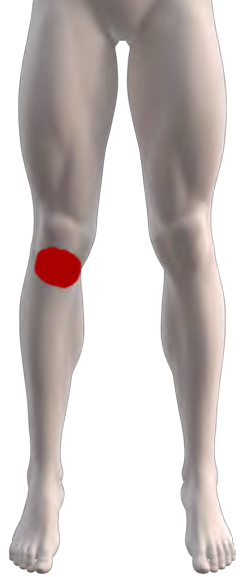

(i) Subject ID: 36

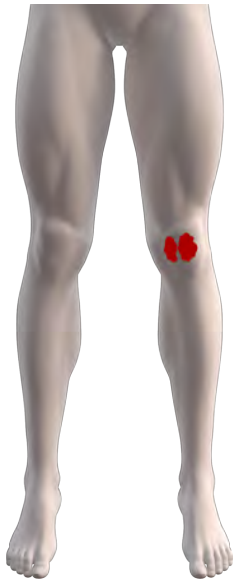

(a) Subject ID: 37

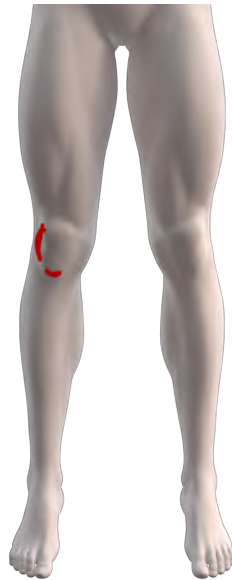

(b) Subject ID: 38

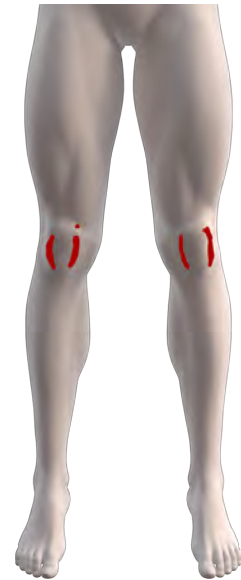

(c) Subject ID: 39

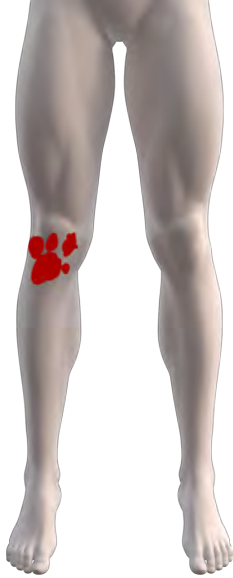

(d) Subject ID: 40

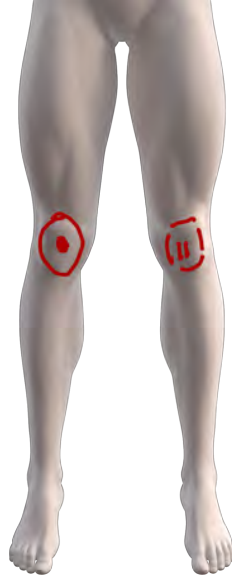

(e) Subject ID: 41

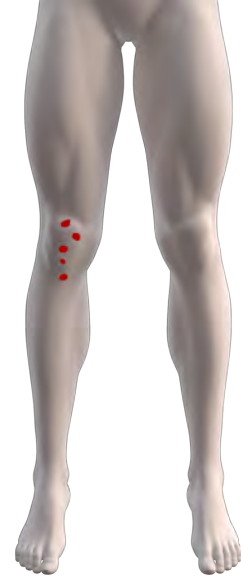

(f) Subject ID: 42

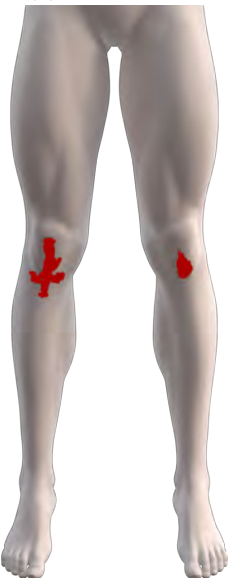

(g) Subject ID: 43

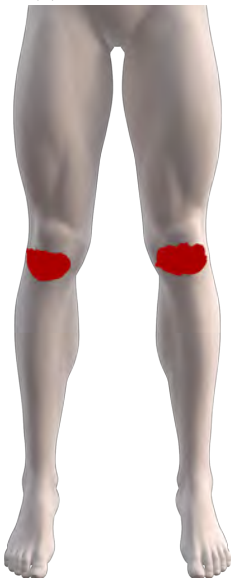

(h) Subject ID: 44

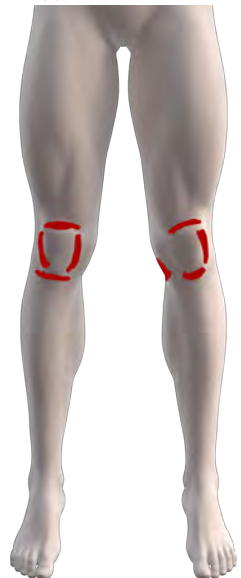

(i) Subject ID: 45

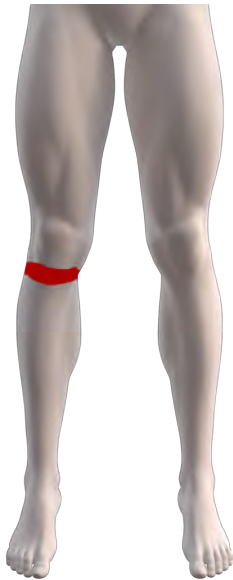

*(a) Subject ID: 46*

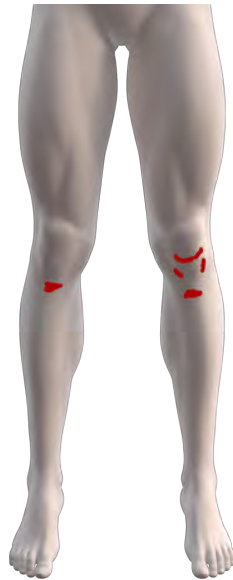

*(b) Subject ID: 47*

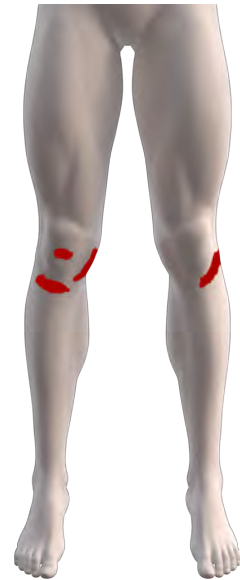

*(c) Subject ID: 48*

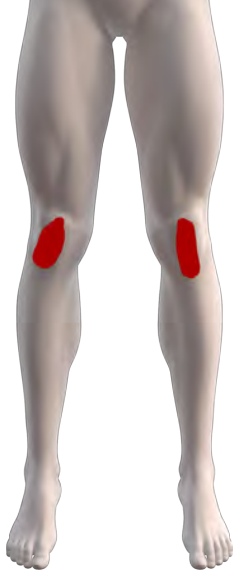

*(d) Subject ID: 49*

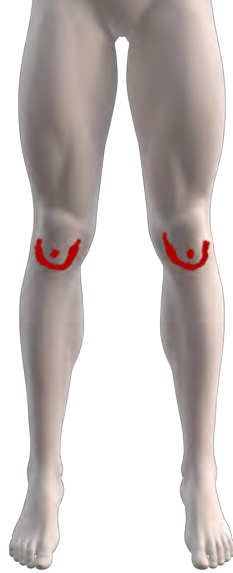

*(e) Subject ID: 50*

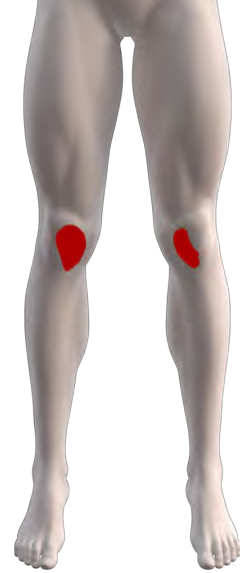

*(f) Subject ID: 51*

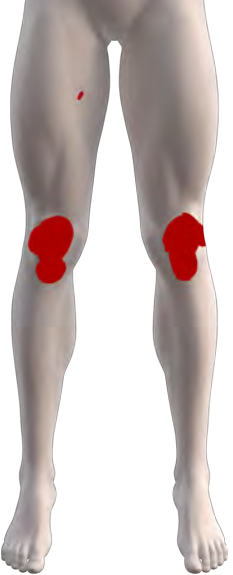

*(g) Subject ID: 52*

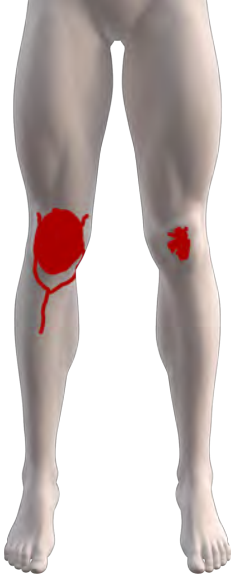

*(h) Subject ID: 53*

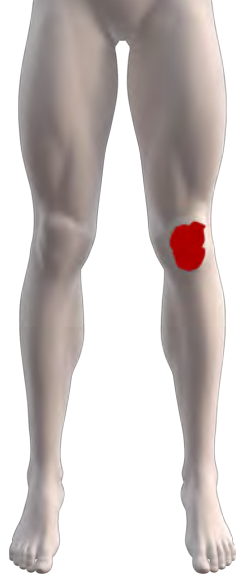

*(i) Subject ID: 54*



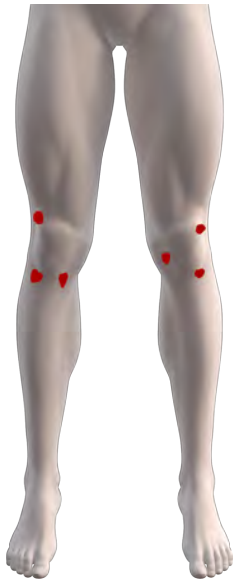

(a) Subject ID: 55

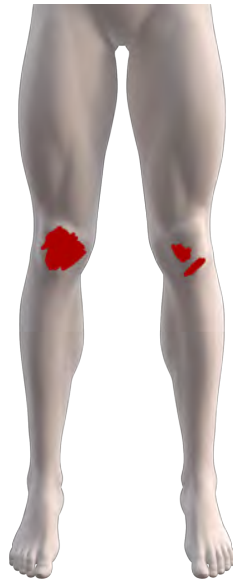

(b) Subject ID: 56

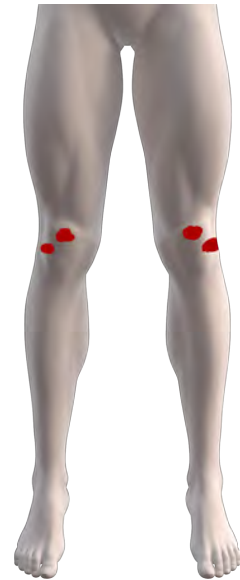

(c) Subject ID: 57

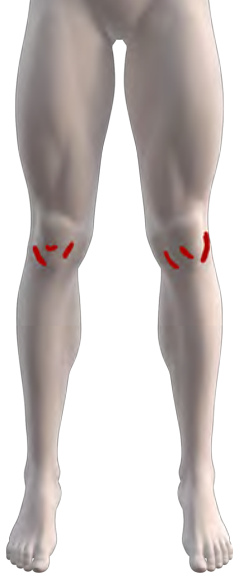

(d) Subject ID: 58

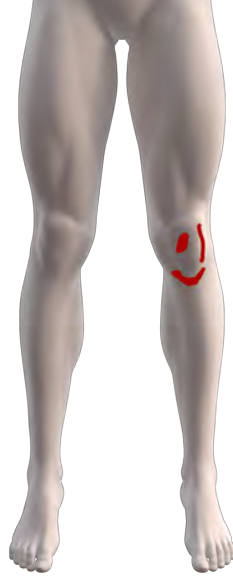

(e) Subject ID: 59

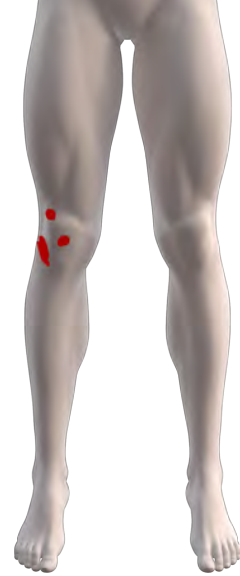

(f) Subject ID: 60

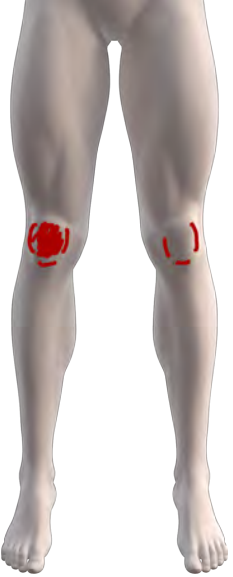

(g) Subject ID: 61

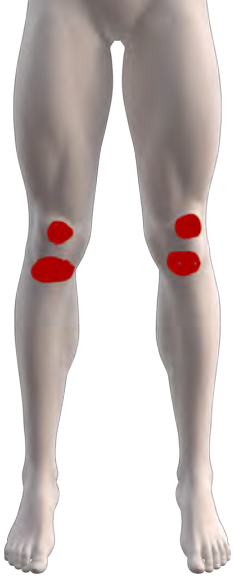

(h) Subject ID: 62

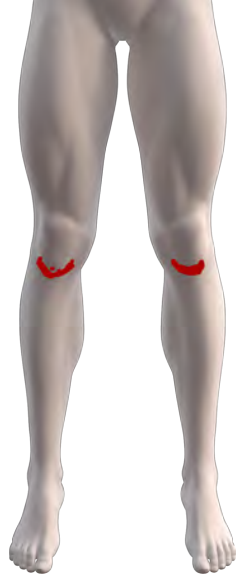

(i) Subject ID: 63



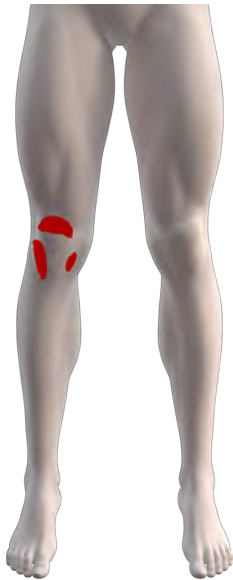

*(a) Subject ID: 64*

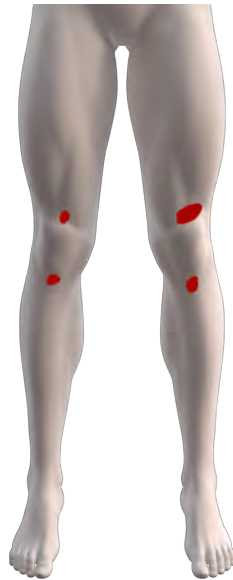

*(b) Subject ID: 65*

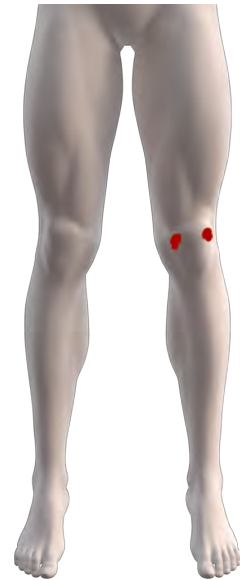

*(c) Subject ID: 66*

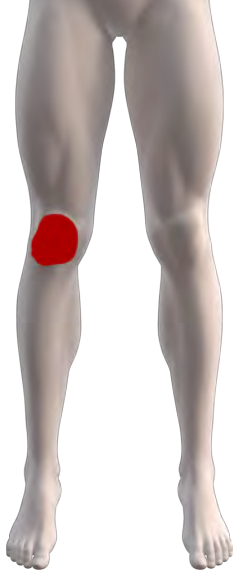

*(d) Subject ID: 67*

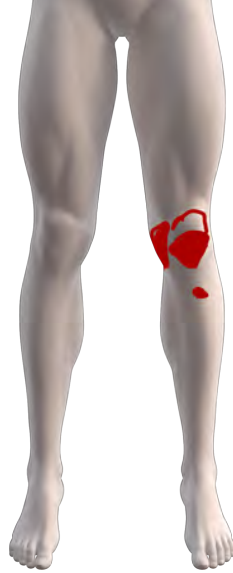

*(e) Subject ID: 68*

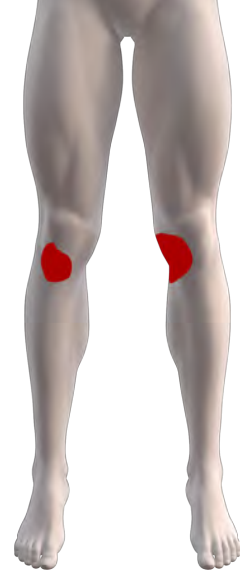

*(f) Subject ID: 69*

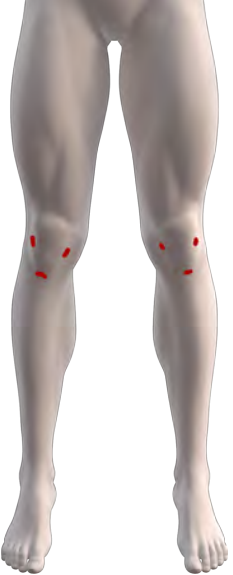

*(g) Subject ID: 70*

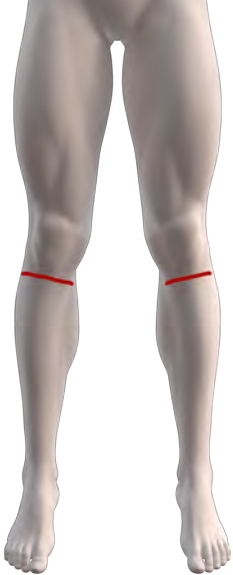

*(h) Subject ID: 71*

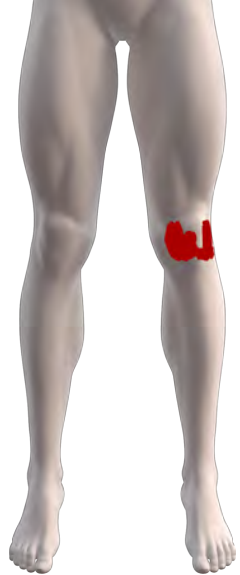

*(i) Subject ID: 72*

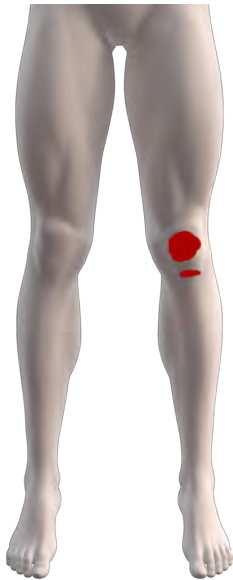

(a) Subject ID: 73

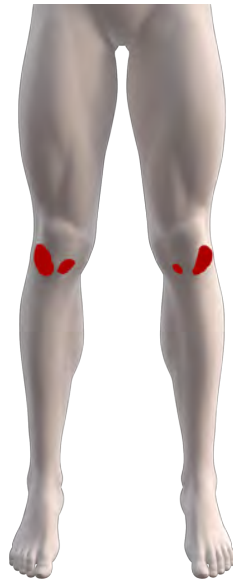

(b) Subject ID: 74

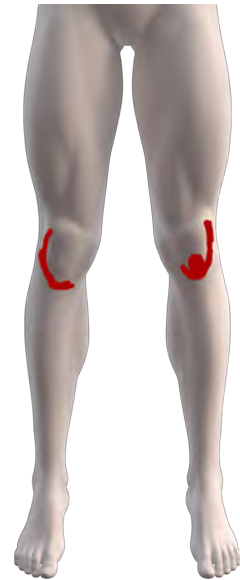

(c) Subject ID: 75

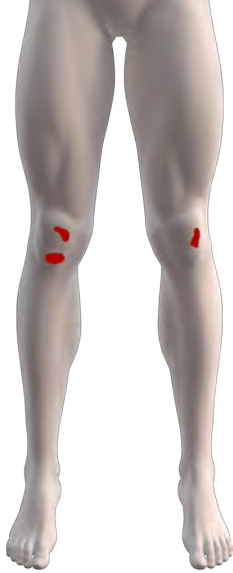

(d) Subject ID: 76

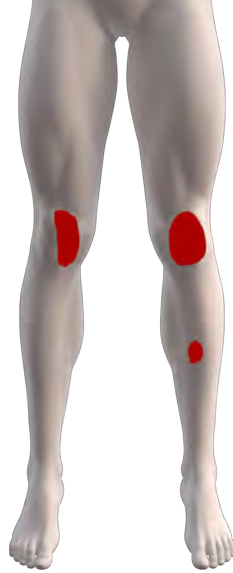

(e) Subject ID: 77

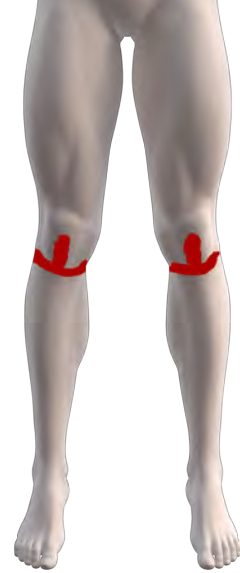

(f) Subject ID: 78

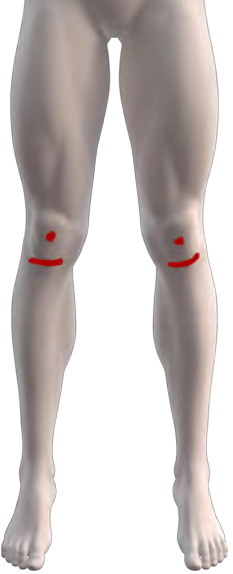

(g) Subject ID: 79

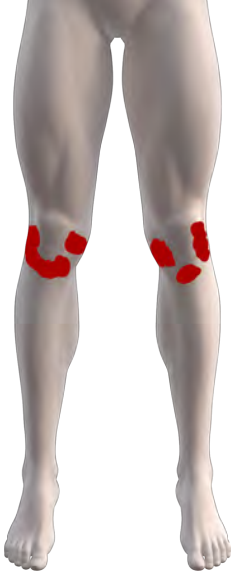

(h) Subject ID: 80

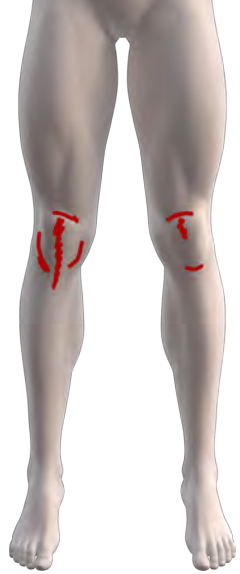

(i) Subject ID: 81

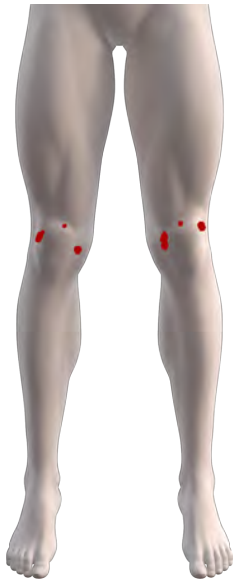

(a) Subject ID: 82

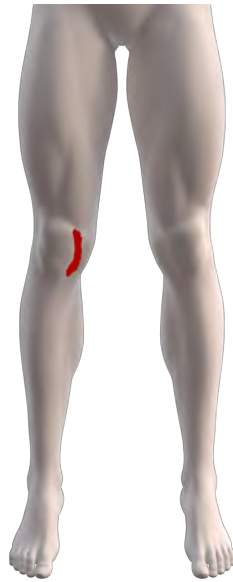

(b) Subject ID: 83

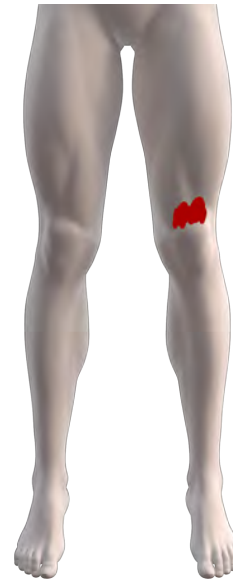

(c) Subject ID: 84

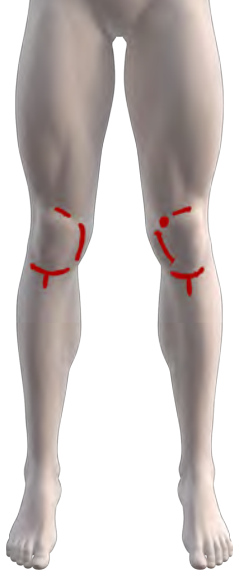

(d) Subject ID: 85

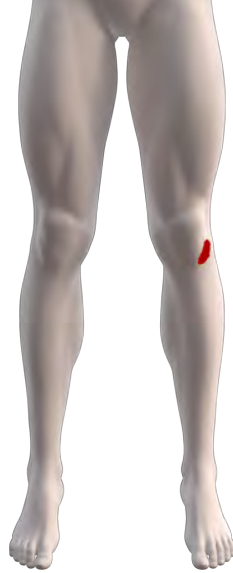

(e) Subject ID: 86

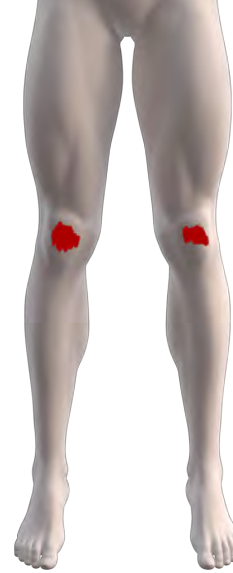

(f) Subject ID: 87

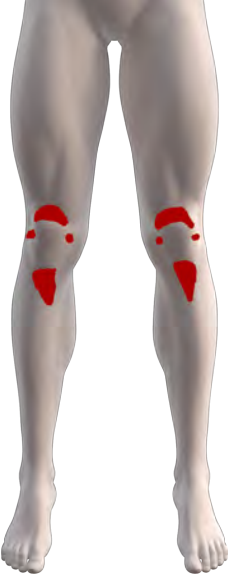

(g) Subject ID: 88

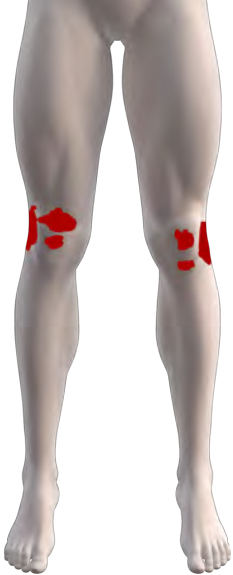

(h) Subject ID: 89

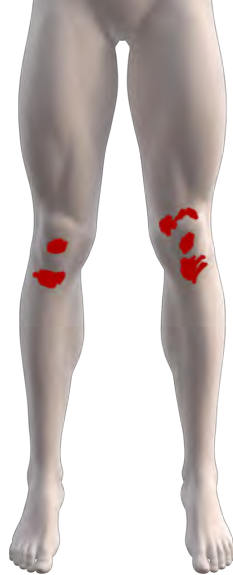

(i) Subject ID: 90

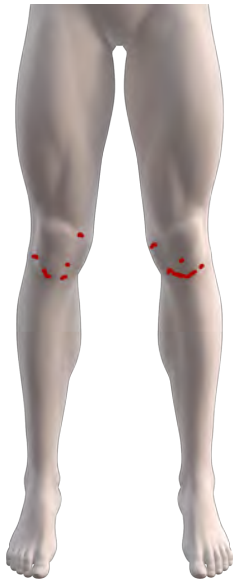

(a) Subject ID: 91

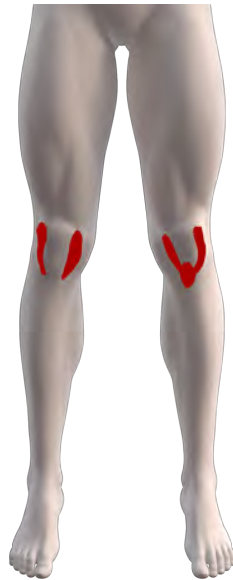

(b) Subject ID: 92

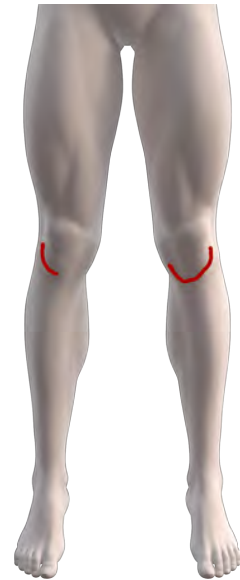

(c) Subject ID: 93

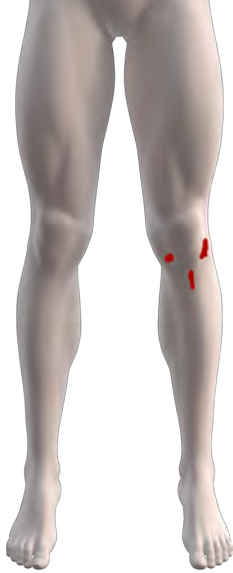

(d) Subject ID: 94

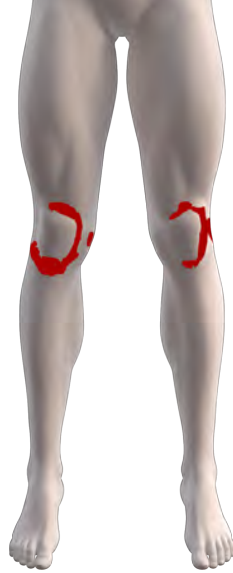

(e) Subject ID: 95

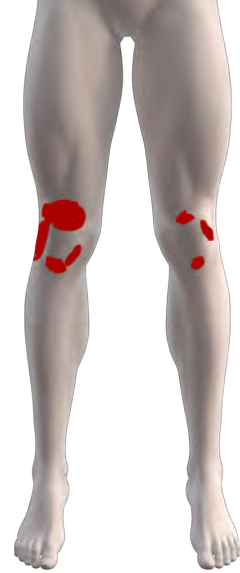

(f) Subject ID: 96

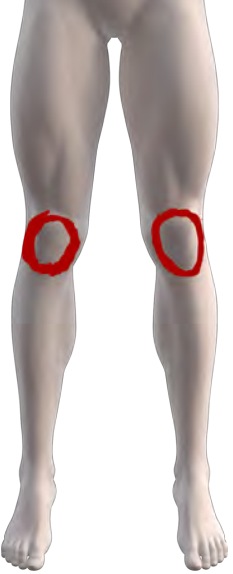

(g) Subject ID: 97

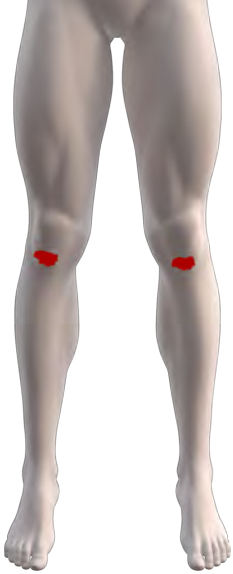

(h) Subject ID: 98

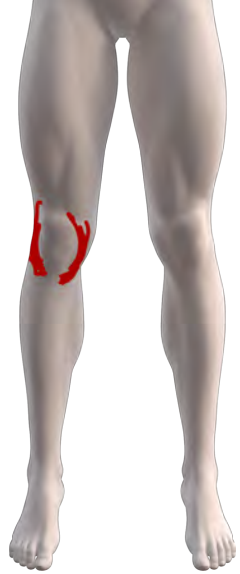

(i) Subject ID: 99

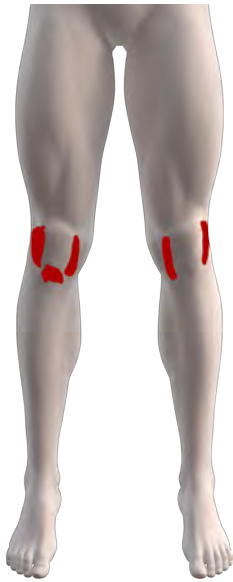

(a) Subject ID: 100

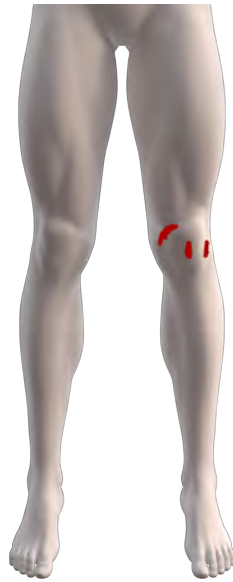

(b) Subject ID: 101

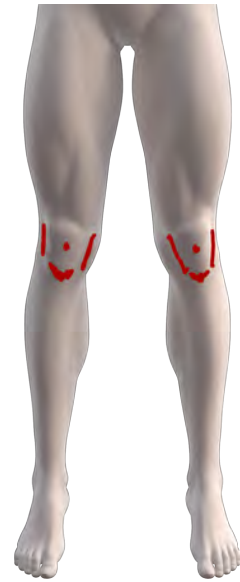

(c) Subject ID: 102

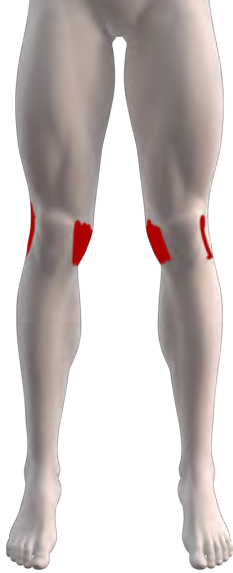

(d) Subject ID: 103

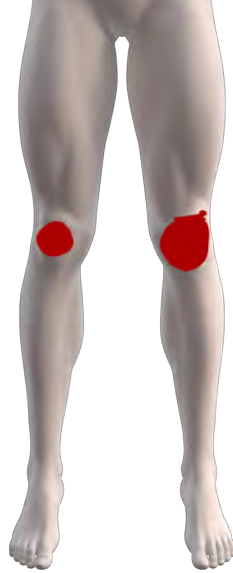

(e) Subject ID: 104

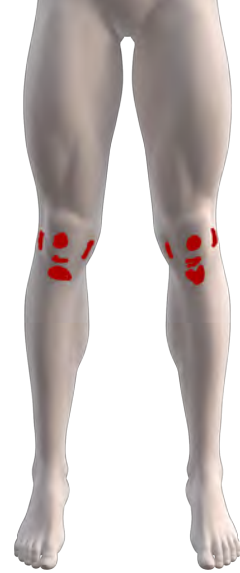

(f) Subject ID: 105

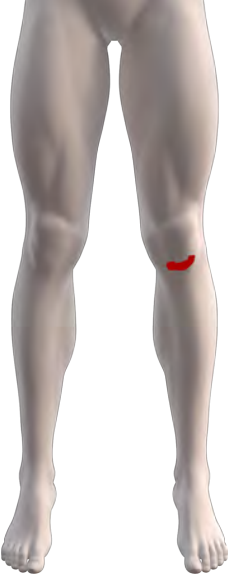

(g) Subject ID: 106

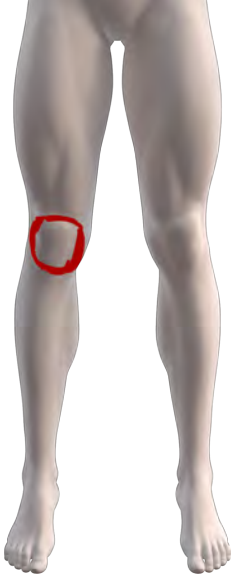

(h) Subject ID: 107

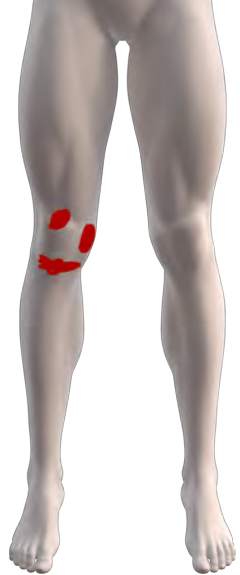

(i) Subject ID: 108

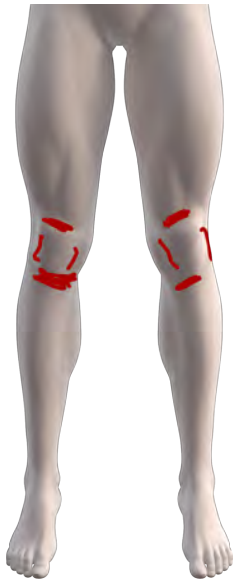

*(a) Subject ID: 109*

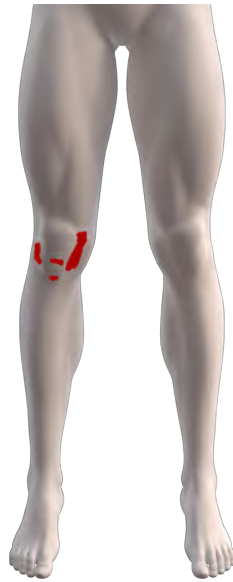

*(b) Subject ID: 110*

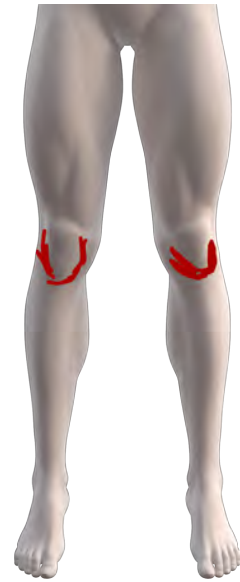

*(c) Subject ID: 111*

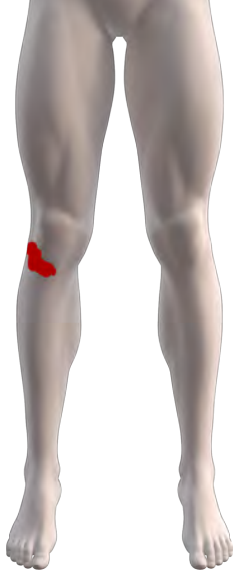

*(d) Subject ID: 112*

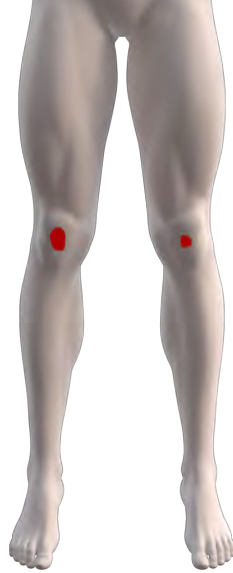

*(e) Subject ID: 113*

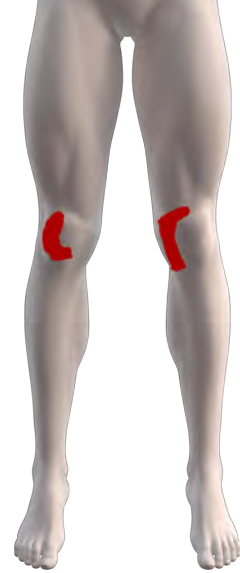

*(f) Subject ID: 114*

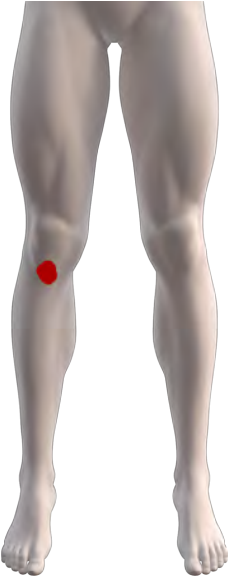

*(g) Subject ID: 115*

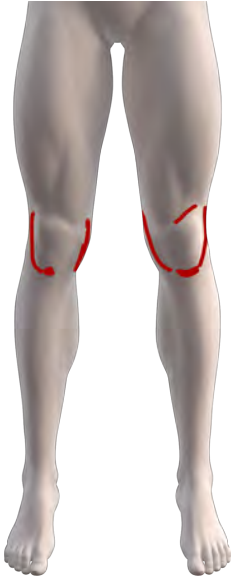

*(h) Subject ID: 116*

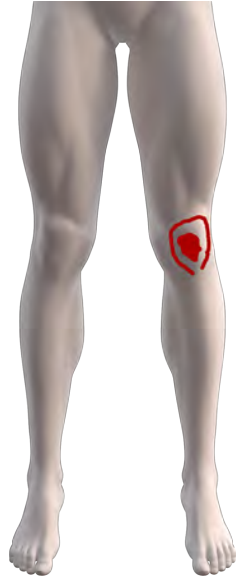

*(i) Subject ID: 117*



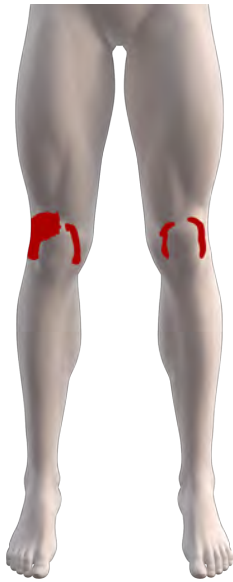

(a) Subject ID: 118

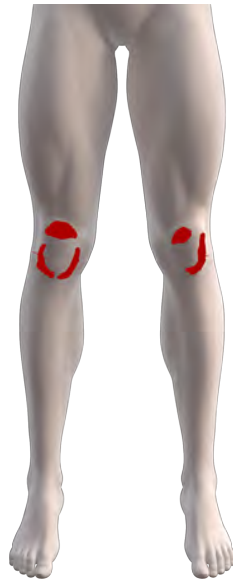

(b) Subject ID: 119

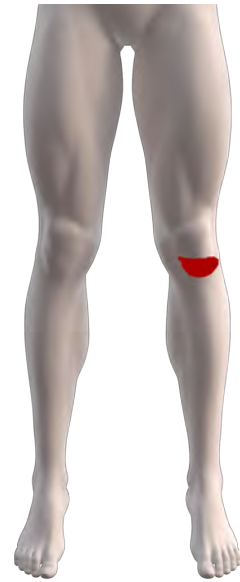

(c) Subject ID: 120

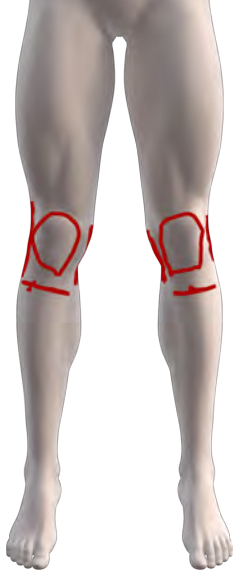

(d) Subject ID: 121

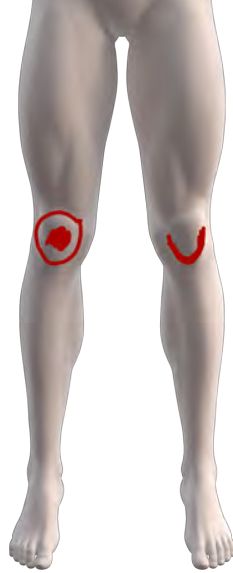

(e) Subject ID: 122

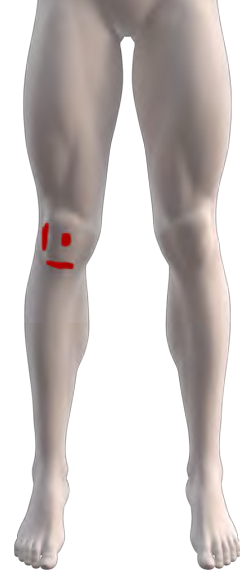

(f) Subject ID: 123

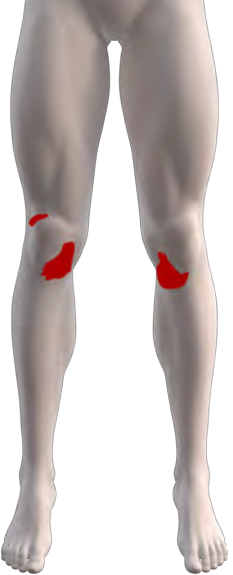

(g) Subject ID: 124

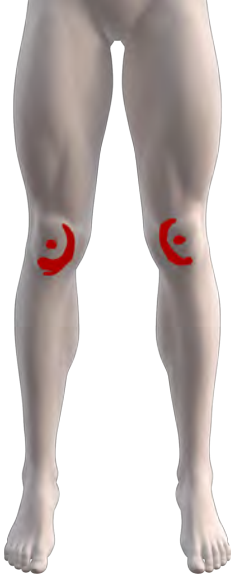

(h) Subject ID: 125

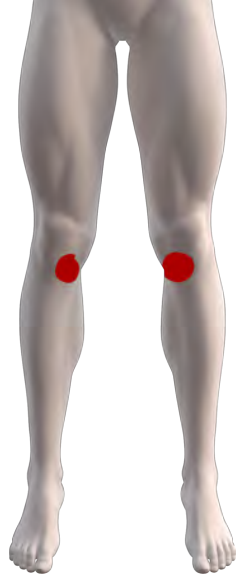

(i) Subject ID: 126



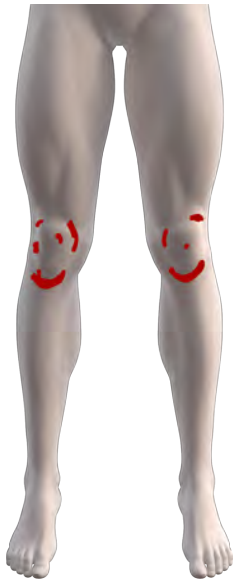

(a) Subject ID: 127

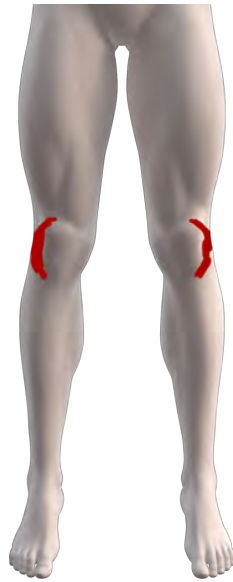

(b) Subject ID: 128

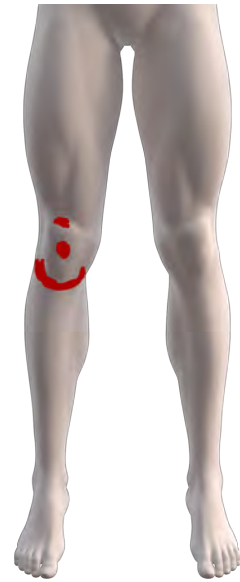

(c) Subject ID: 129

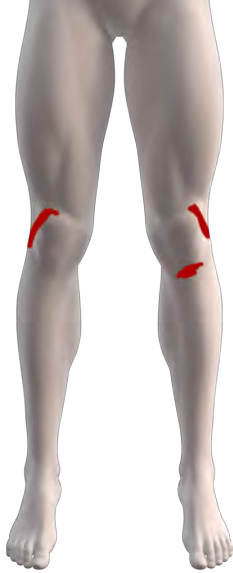

(d) Subject ID: 130

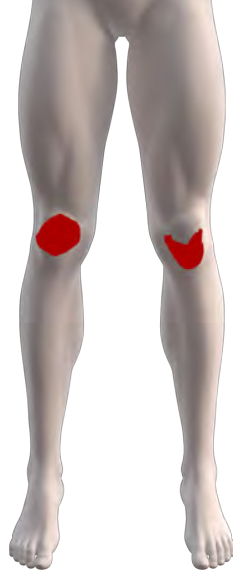

(e) Subject ID: 131

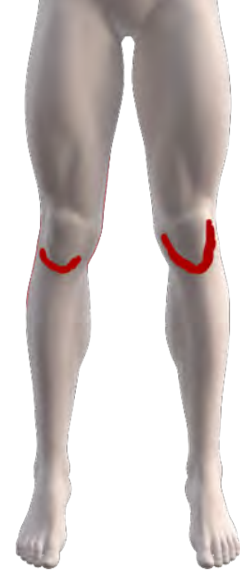

(f) Subject ID: 132

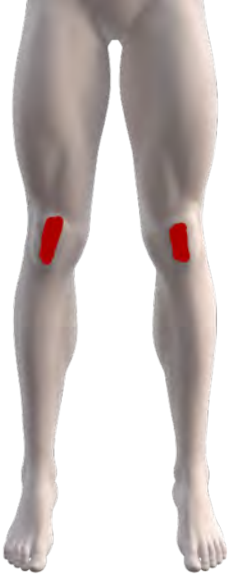

(g) Subject ID: 133

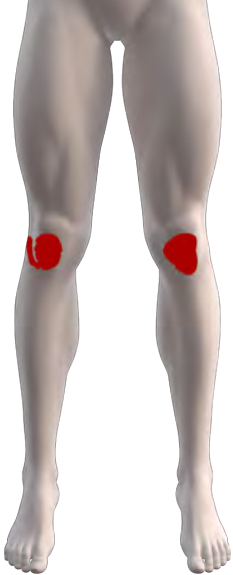

(h) Subject ID: 134

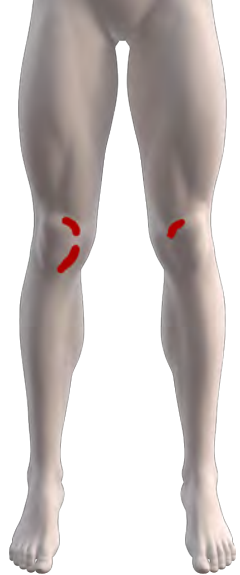

(i) Subject ID: 135

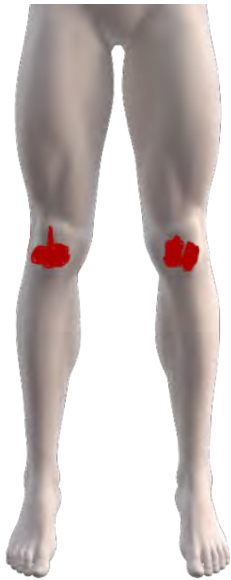

(a) Subject ID: 136

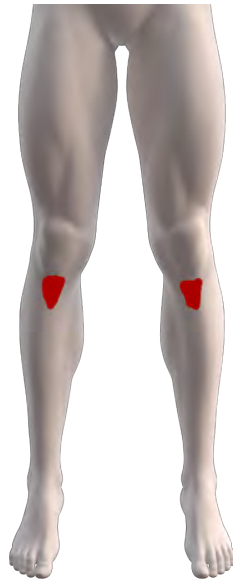

(b) Subject ID: 137

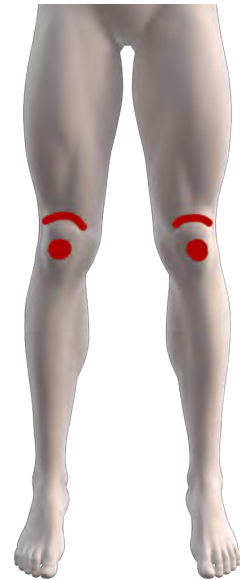

(c) Subject ID: 138

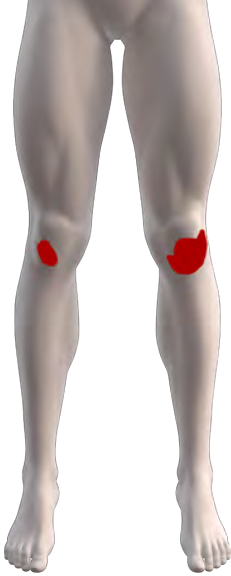

(d) Subject ID: 139

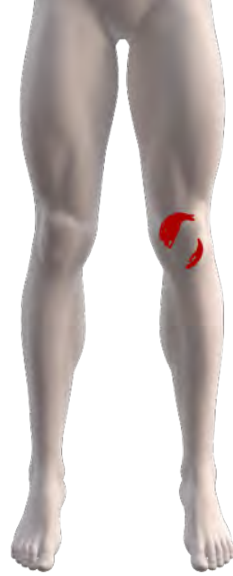

(e) Subject ID: 140

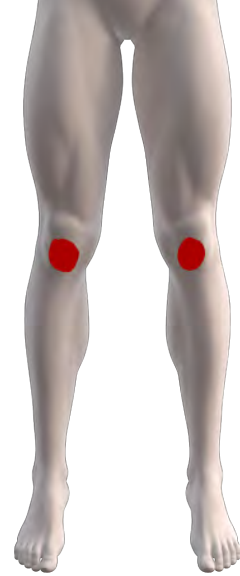

(f) Subject ID: 141

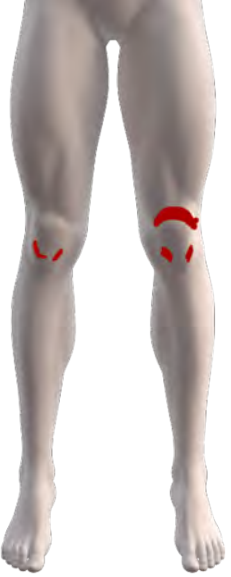

(g) Subject ID: 142

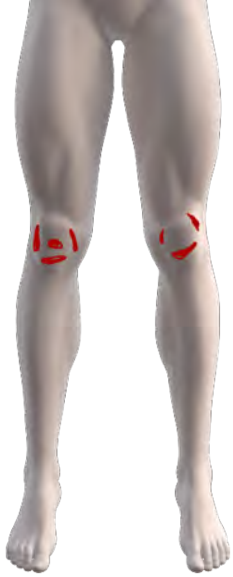

(h) Subject ID: 143

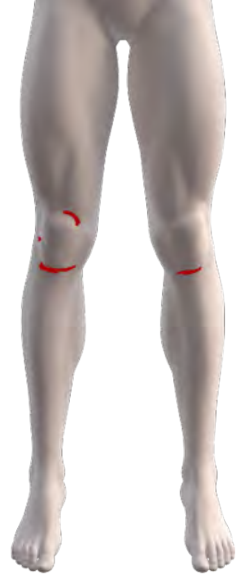

(i) Subject ID: 144

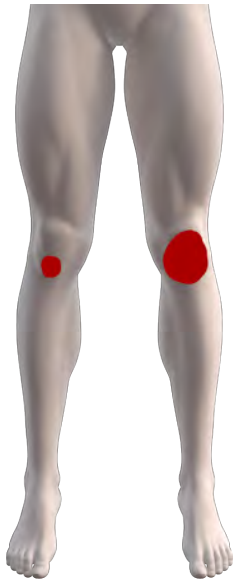

(a) Subject ID: 145

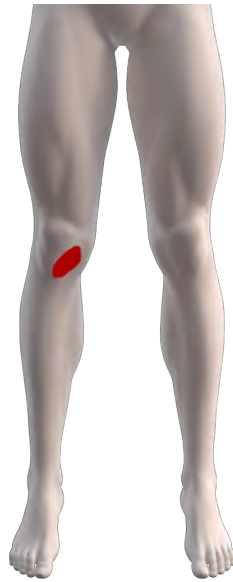

(b) Subject ID: 146

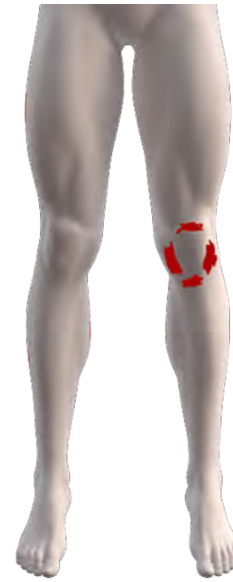

(c) Subject ID: 147

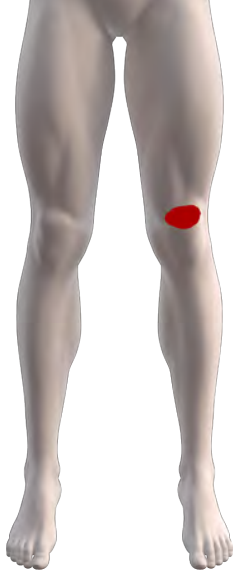

(d) Subject ID: 148

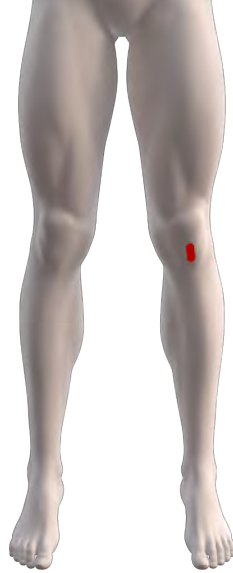

(e) Subject ID: 149

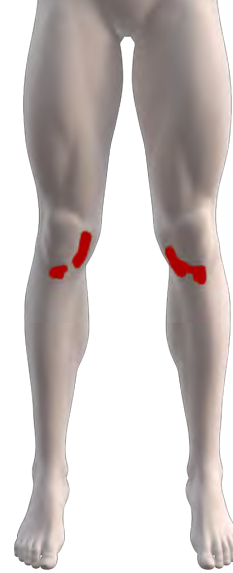

(f) Subject ID: 150

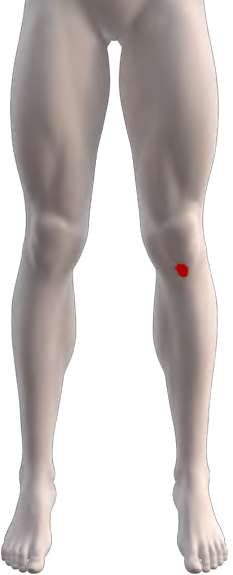

(g) Subject ID: 151

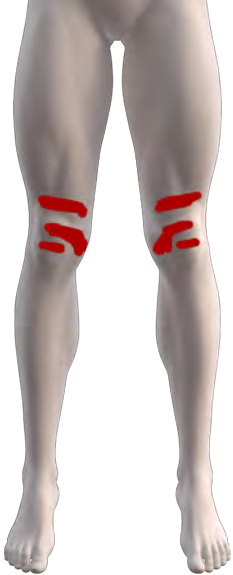

(h) Subject ID: 152

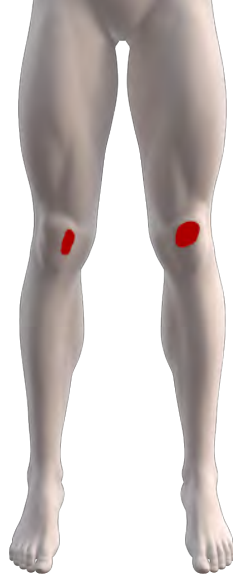

(i) Subject ID: 153

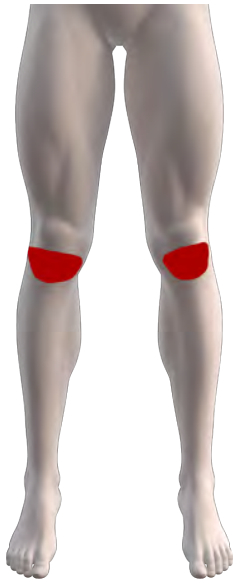

(a) Subject ID: 154

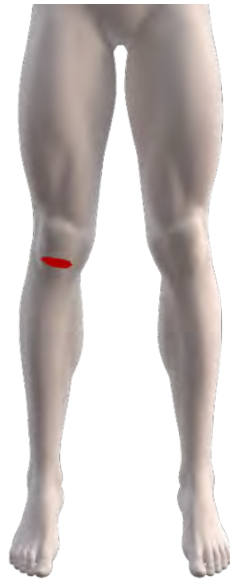

(b) Subject ID: 155

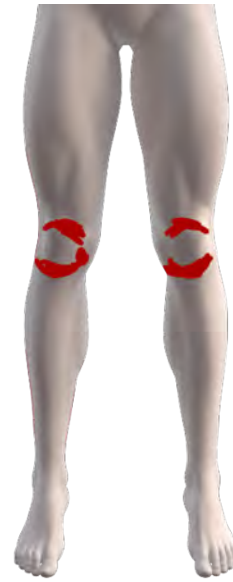

(c) Subject ID: 156

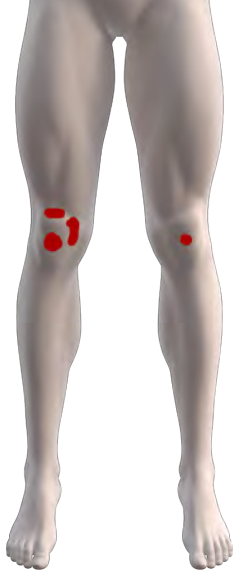

(d) Subject ID: 157

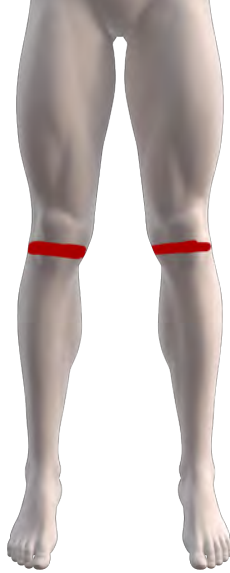

(e) Subject ID: 158

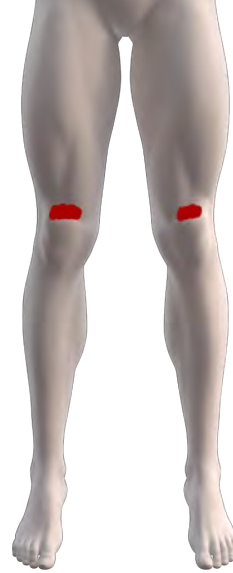

(f) Subject ID: 159

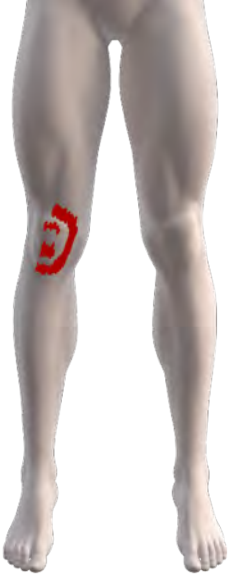

(g) Subject ID: 160

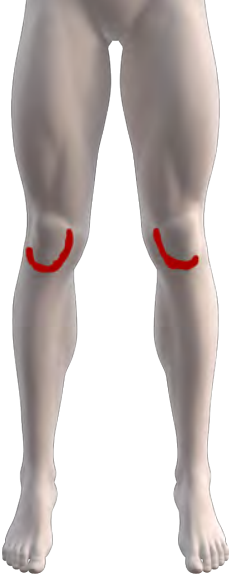

(h) Subject ID: 161

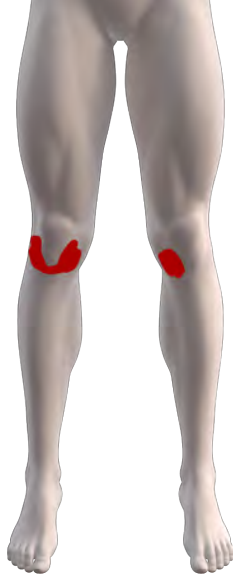

(i) Subject ID: 162

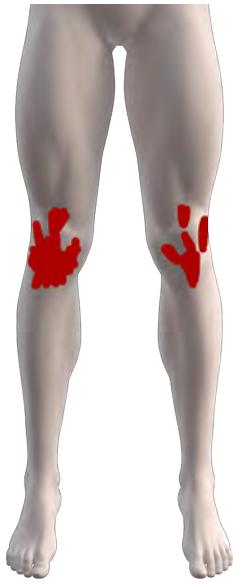

(a) Subject ID: 163

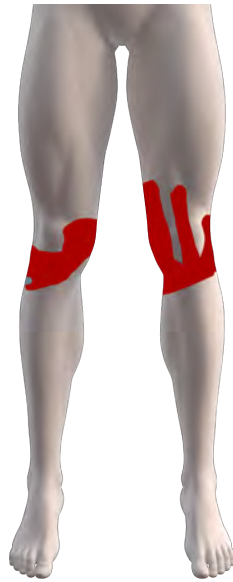

(b) Subject ID: 164

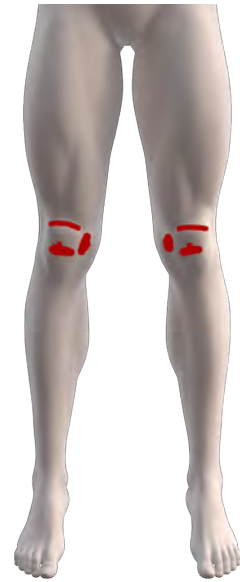

(c) Subject ID: 165

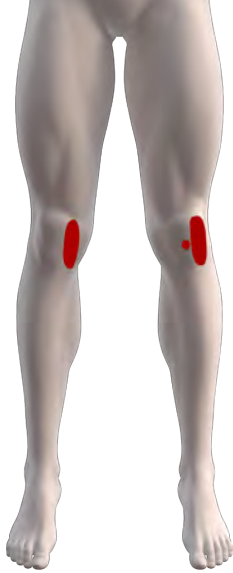

(d) Subject ID: 166

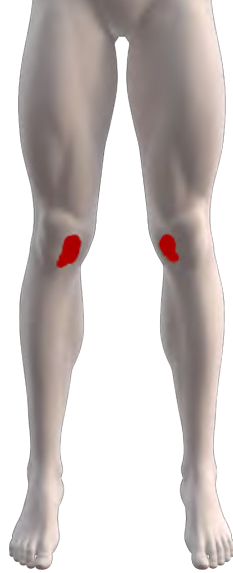

(e) Subject ID: 167

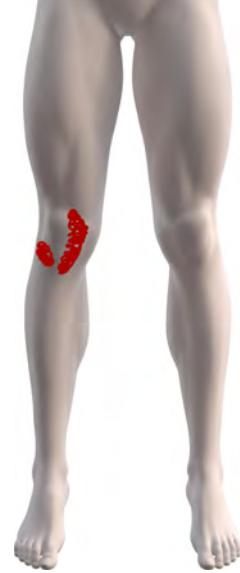

(f) Subject ID: 168

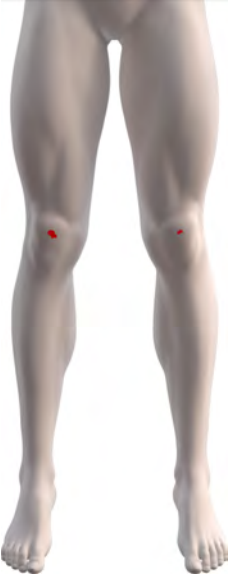

(g) Subject ID: 169

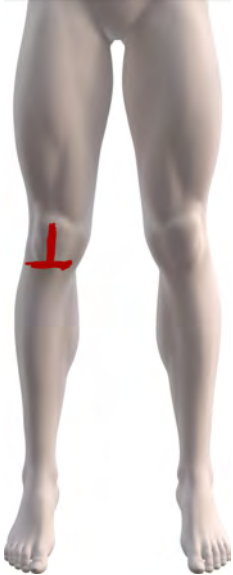

(h) Subject ID: 170

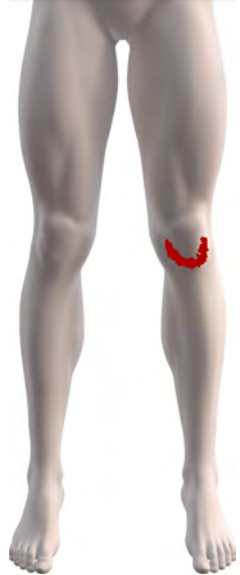

(i) Subject ID: 171

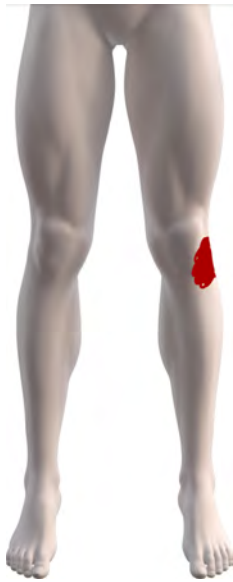

(a) Subject ID: 172

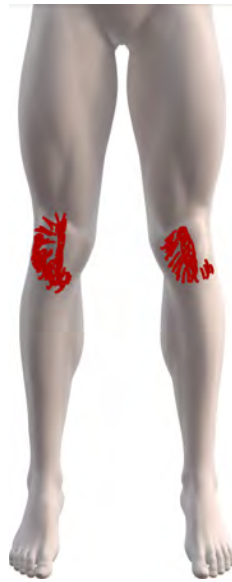

(b) Subject ID: 173

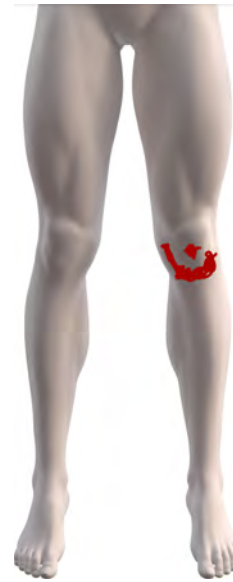

(c) Subject ID: 174

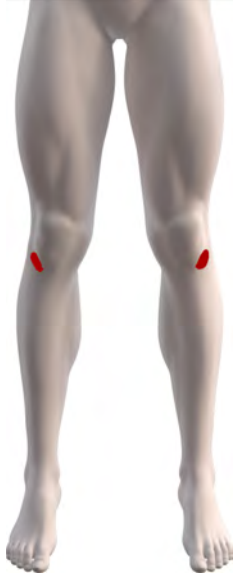

(d) Subject ID: 175

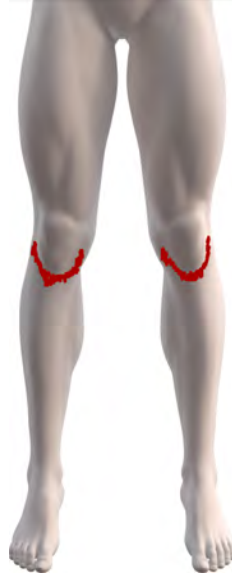

(e) Subject ID: 176

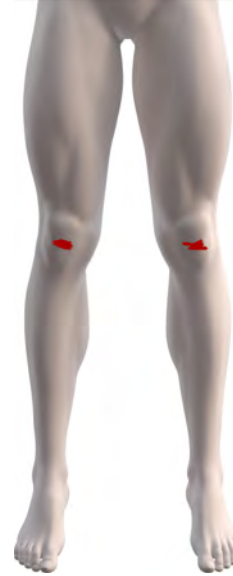

(f) Subject ID: 177

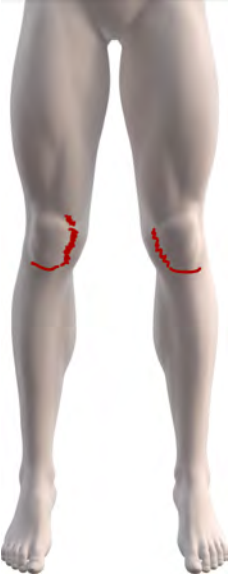

(g) Subject ID: 178

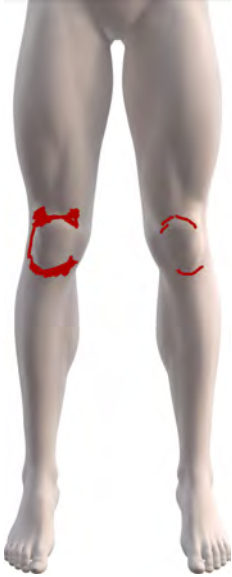

(h) Subject ID: 179

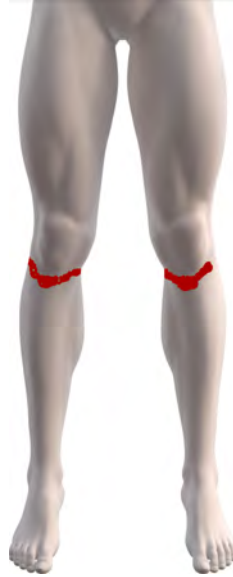

(i) Subject ID: 180



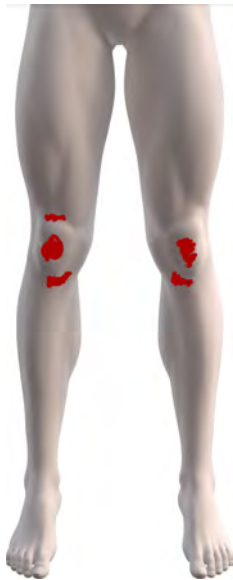

*(a) Subject ID: 181*

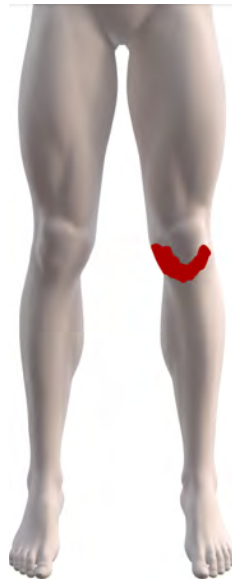

*(b) Subject ID: 182*

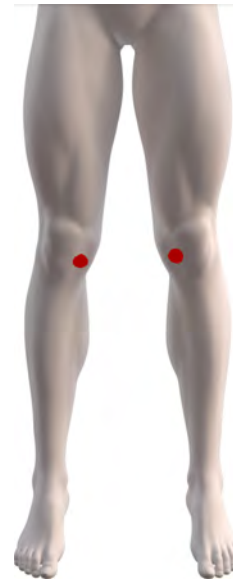

*(c) Subject ID: 183*

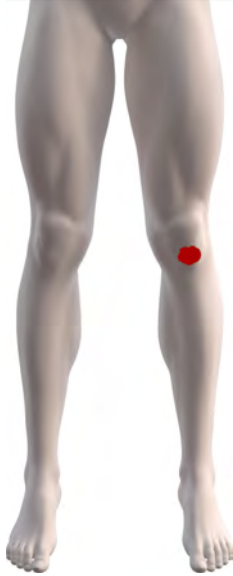

*(d) Subject ID: 184*

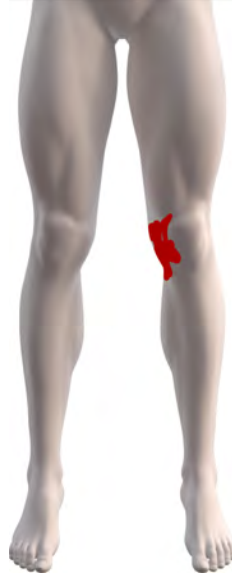

*(e) Subject ID: 185*

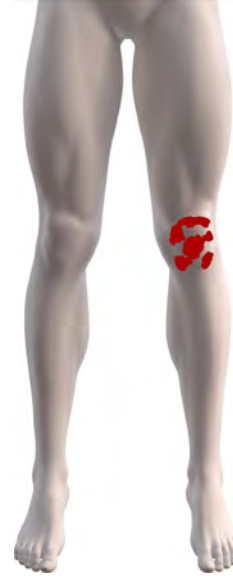

*(f) Subject ID: 186*

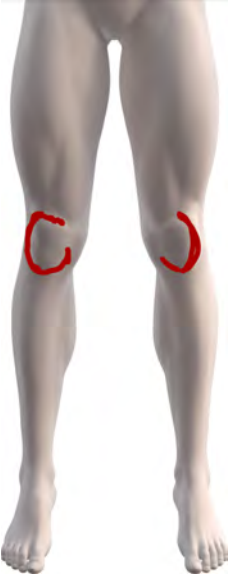

*(g) Subject ID: 187*

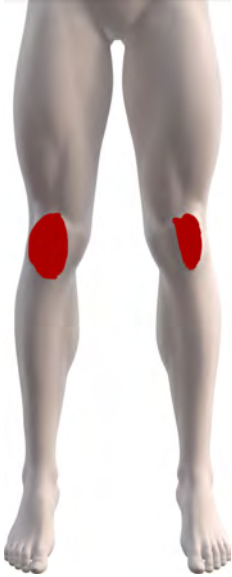

*(h) Subject ID: 188*

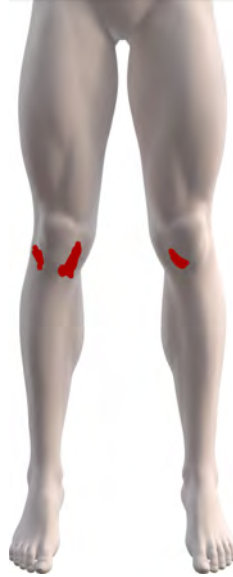

*(i) Subject ID: 189*



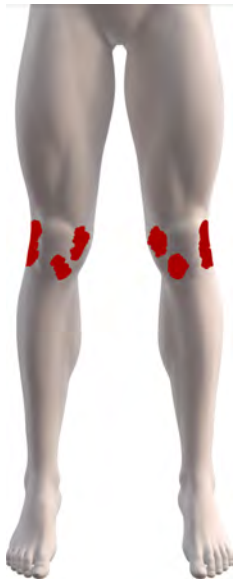

(a) Subject ID: 190

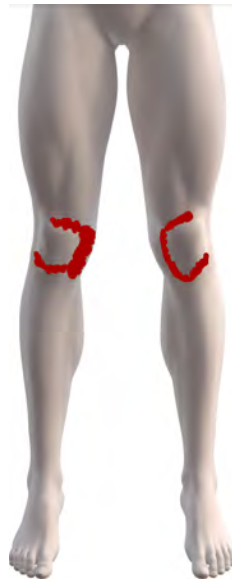

(b) Subject ID: 191

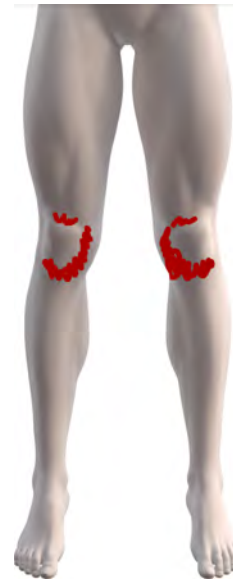

(c) Subject ID: 192

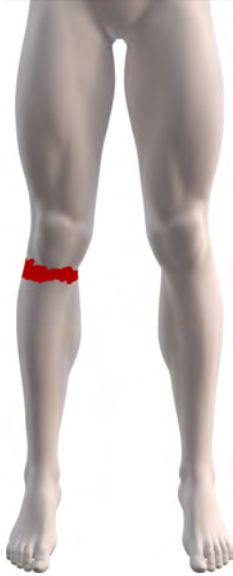

(d) Subject ID: 193

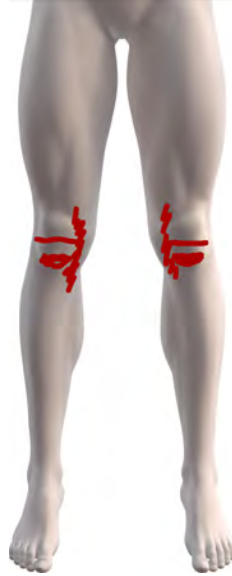

(e) Subject ID: 194

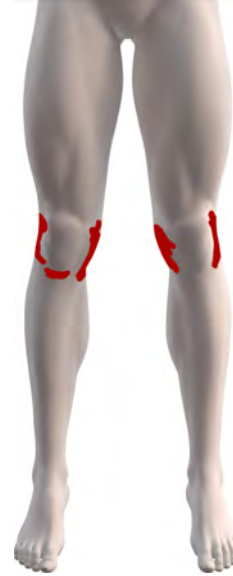

(f) Subject ID: 195

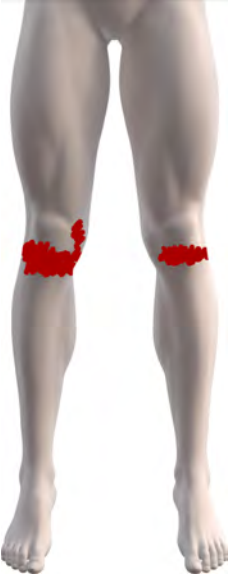

(g) Subject ID: 196

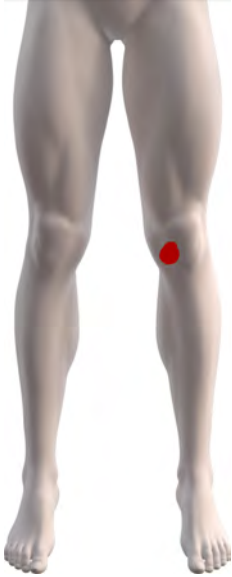

(h) Subject ID: 197

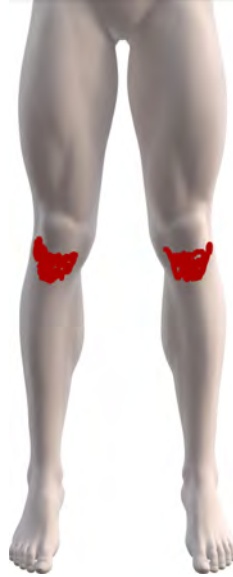

(i) Subject ID: 198

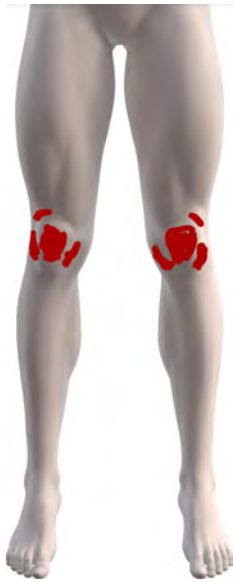

(a) Subject ID: 199

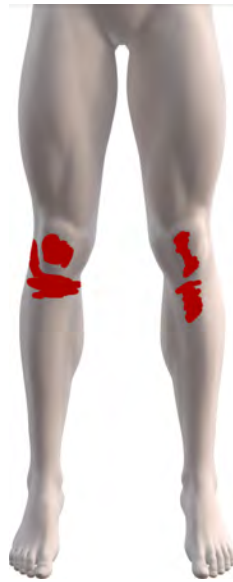

(b) Subject ID: 200

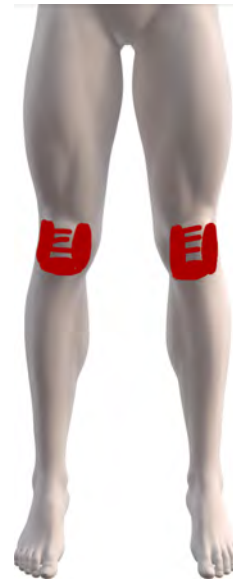

(c) Subject ID: 201

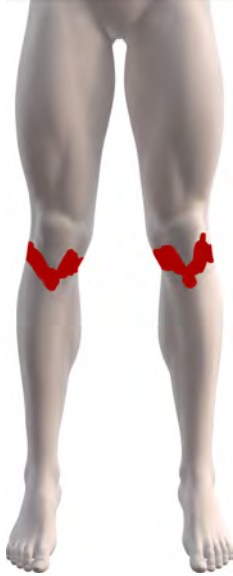

(d) Subject ID: 202

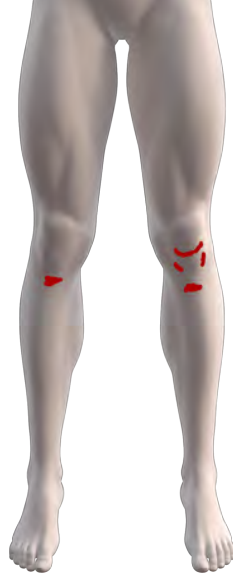

(e) Subject ID: 203

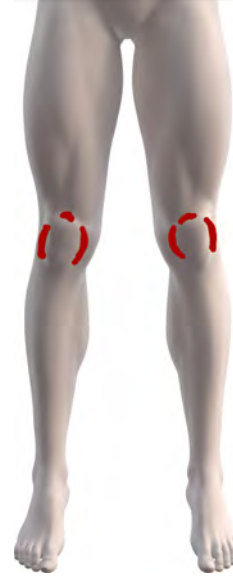

(f) Subject ID: 204

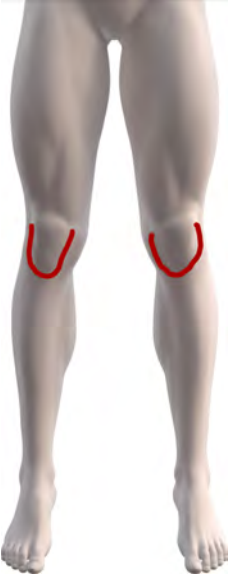

(g) Subject ID: 205

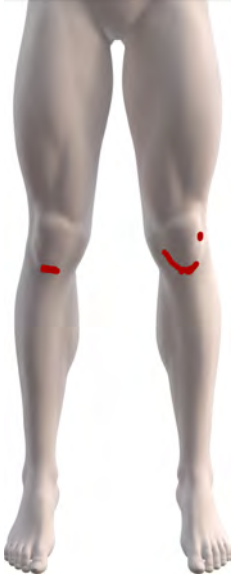

(h) Subject ID: 206

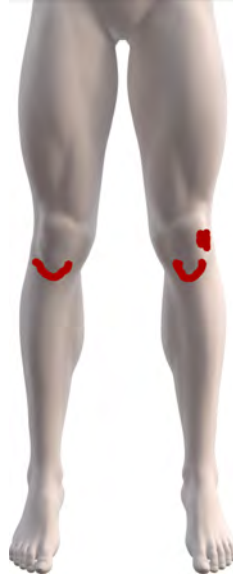

(i) Subject ID: 207

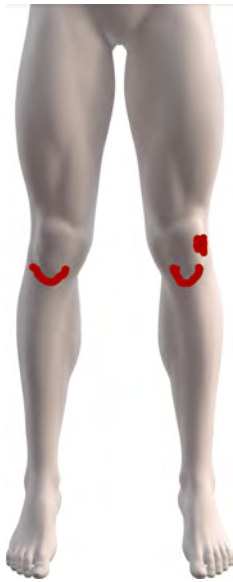

(a) Subject ID: 208

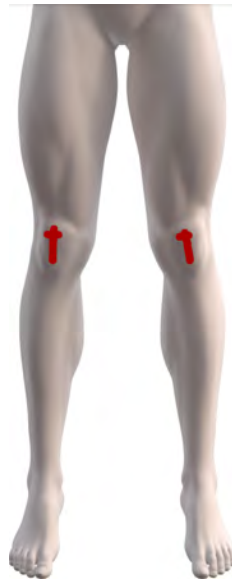

(b) Subject ID: 209

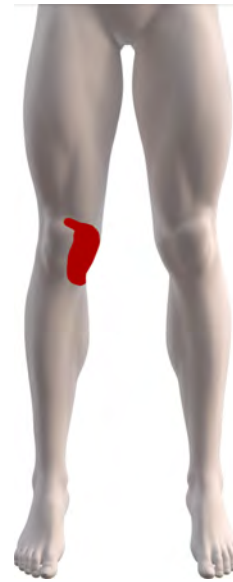

(c) Subject ID: 210

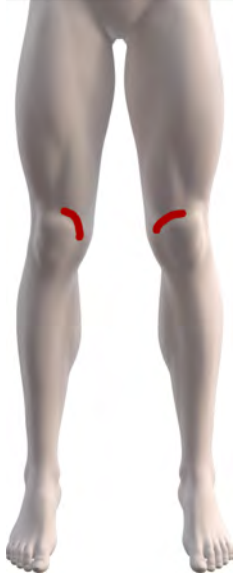

(d) Subject ID: 211

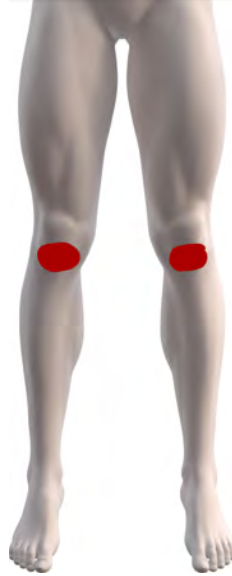

(e) Subject ID: 212

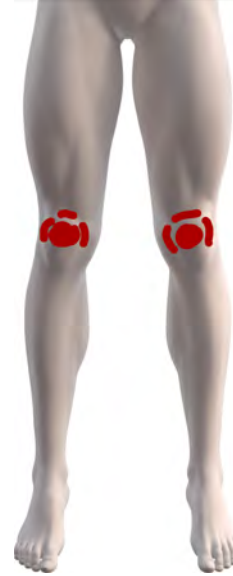

(f) Subject ID: 213

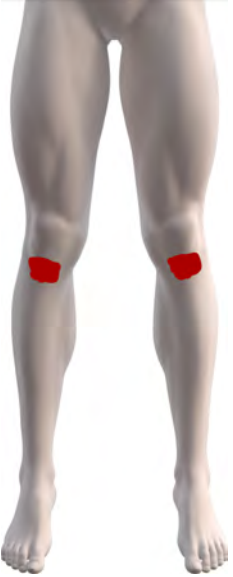

(g) Subject ID: 214

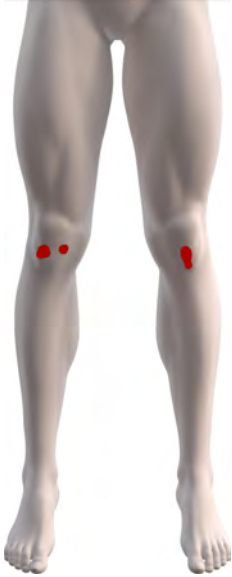

(h) Subject ID: 215

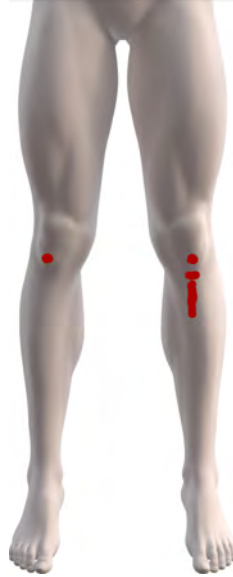

(i) Subject ID: 216

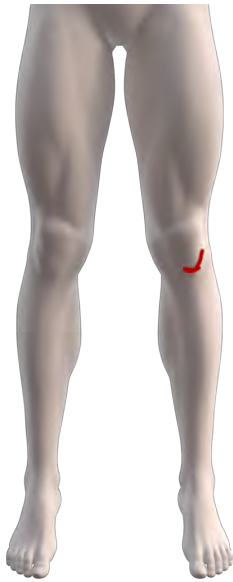

(a) Subject ID: 217

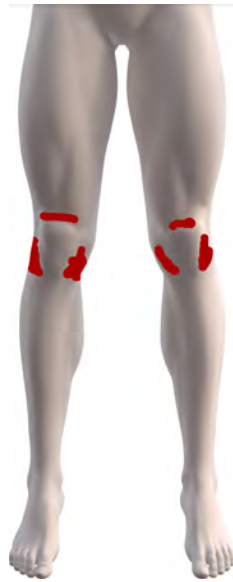

(b) Subject ID: 218

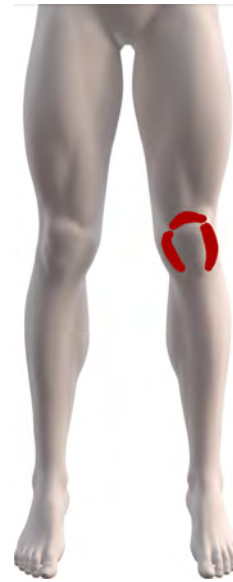

(c) Subject ID: 219

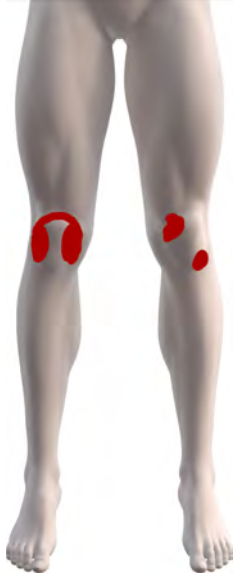

(d) Subject ID: 220

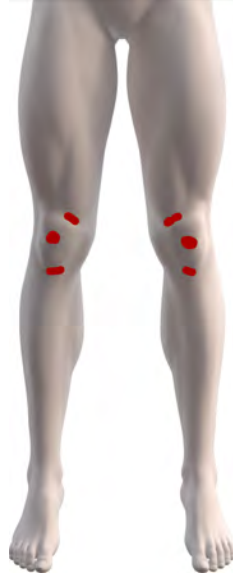

(e) Subject ID: 221

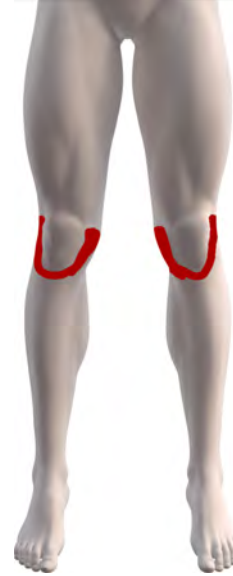

(f) Subject ID: 222

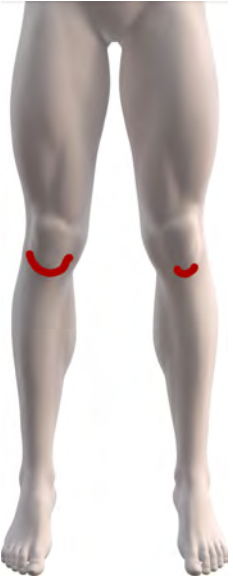

(g) Subject ID: 223

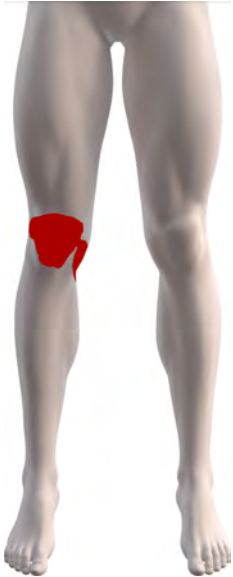

(h) Subject ID: 224

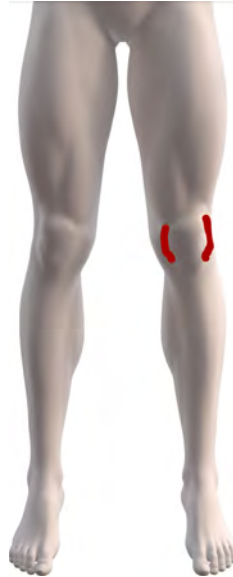

(i) Subject ID: 225

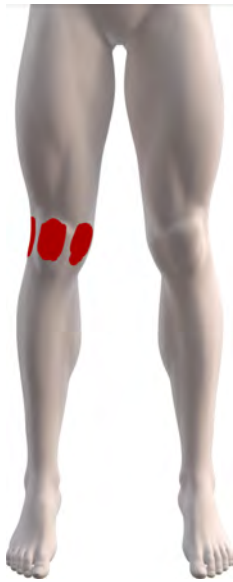

(a) Subject ID: 226

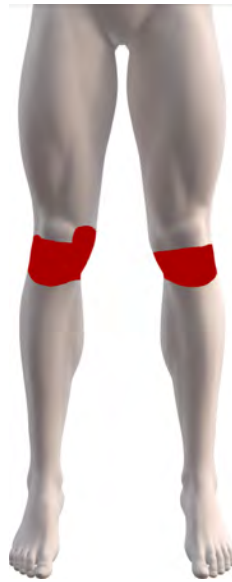

(b) Subject ID: 227

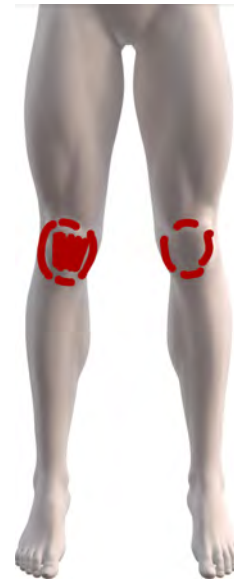

(c) Subject ID: 228

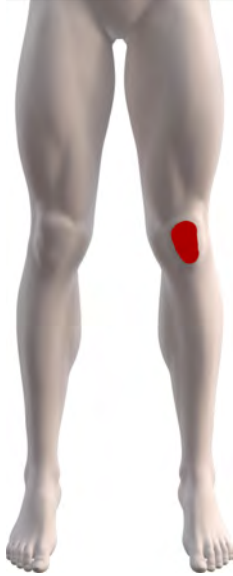

(d) Subject ID: 229

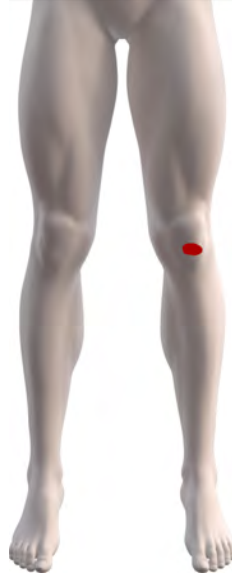

(e) Subject ID: 230

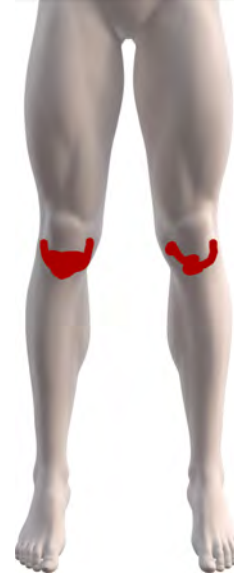

(f) Subject ID: 231

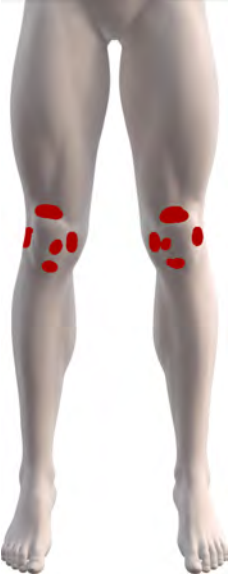

(g) Subject ID: 232

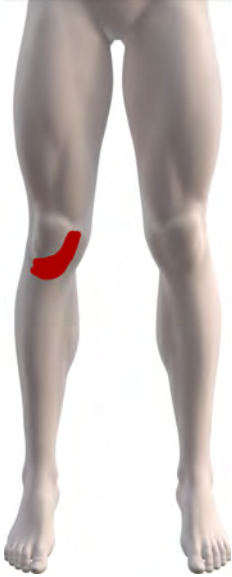

(h) Subject ID: 233

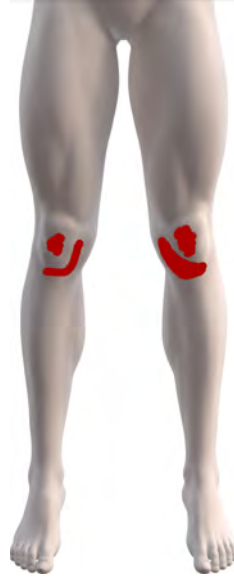

(i) Subject ID: 234



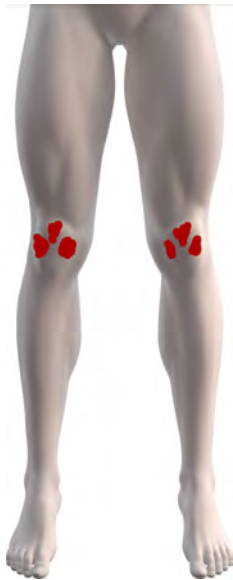

(a) Subject ID: 235

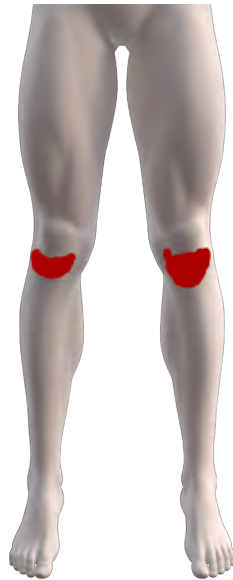

(b) Subject ID: 236

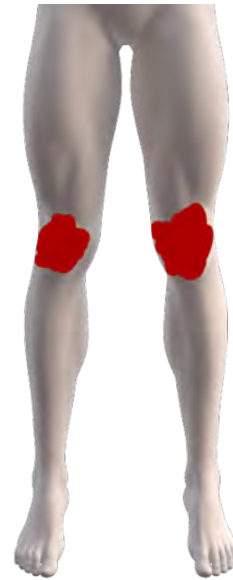

(c) Subject ID: 237

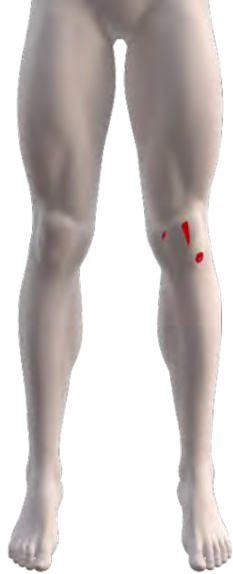

(d) Subject ID: 238

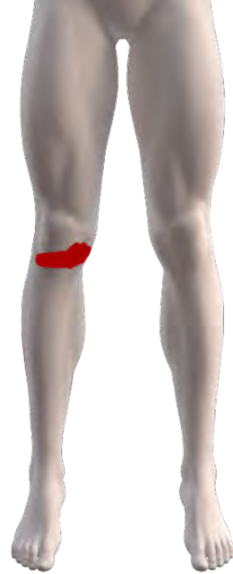

(e) Subject ID: 239

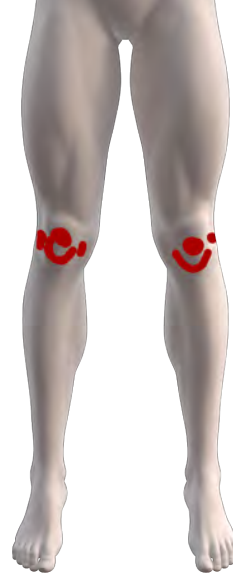

(f) Subject ID: 240

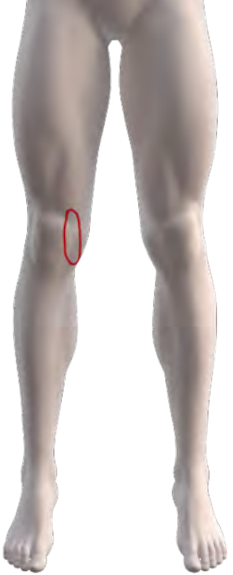

(g) Subject ID: 241

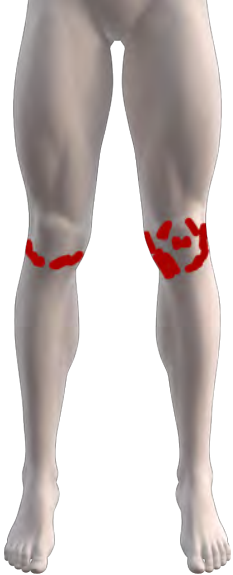

(h) Subject ID: 242

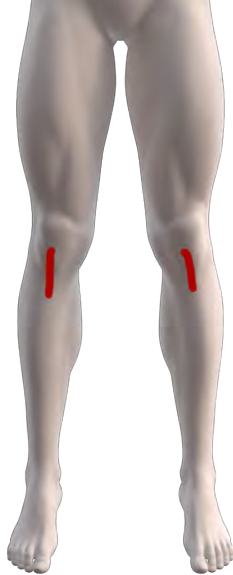

(i) Subject ID: 243

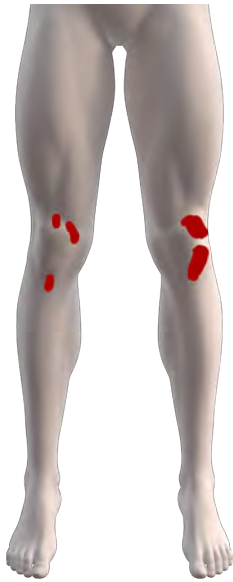

(a) Subject ID: 244

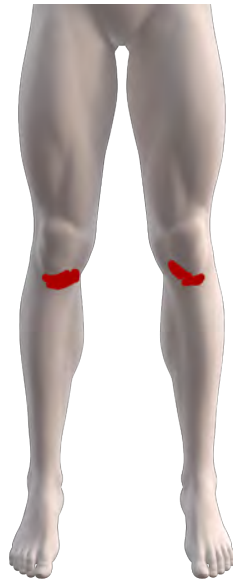

(b) Subject ID: 245

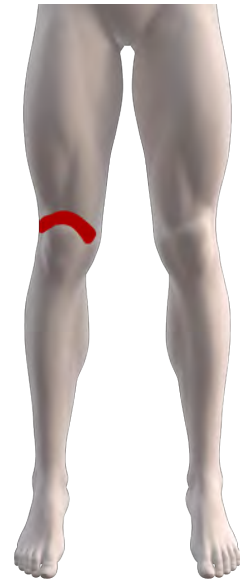

(c) Subject ID: 246

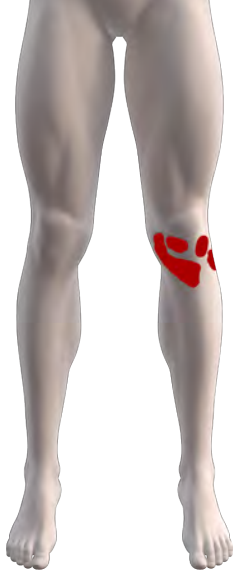

(d) Subject ID: 247

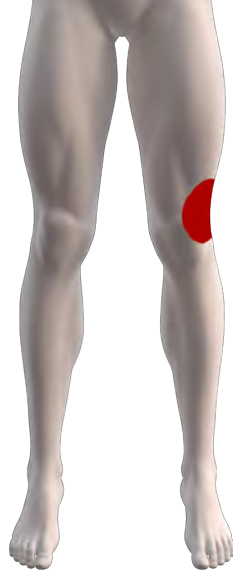

(e) Subject ID: 248

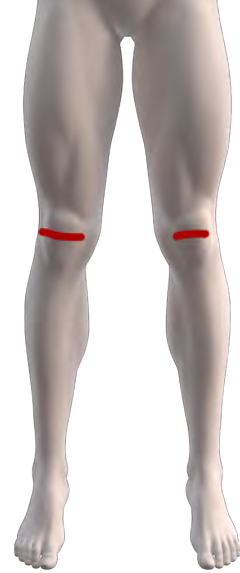

(f) Subject ID: 249

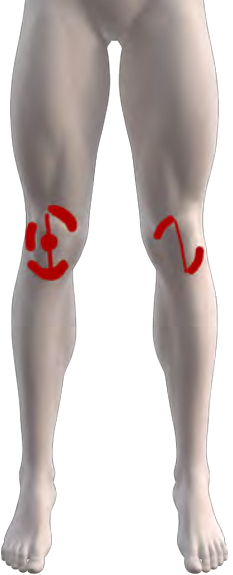

(g) Subject ID: 250

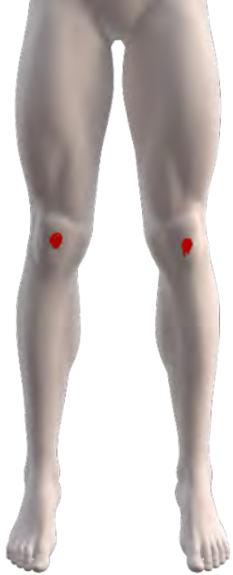

(h) Subject ID: 251

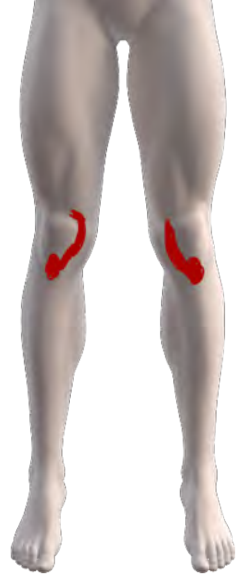

(i) Subject ID: 252



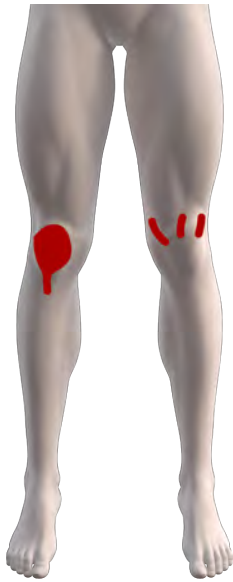

(a) Subject ID: 253

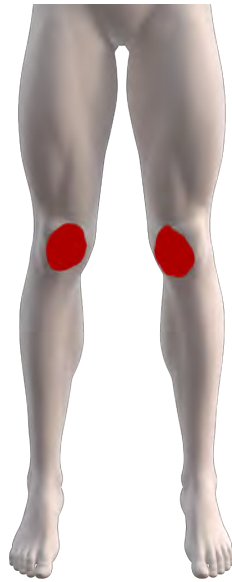

(b) Subject ID: 254

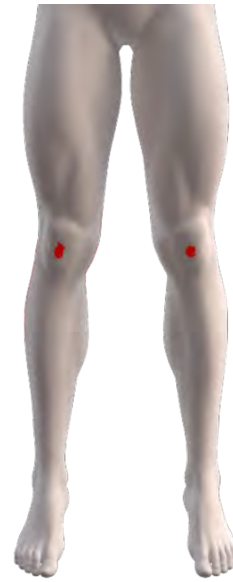

(c) Subject ID: 255

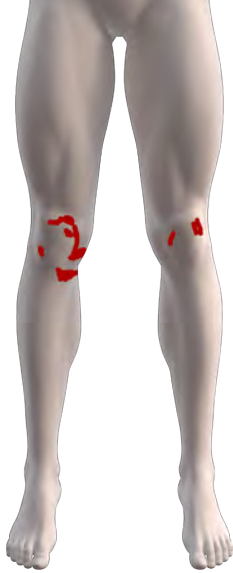

(d) Subject ID: 256

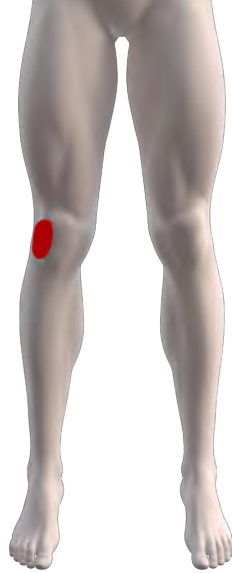

(e) Subject ID: 257

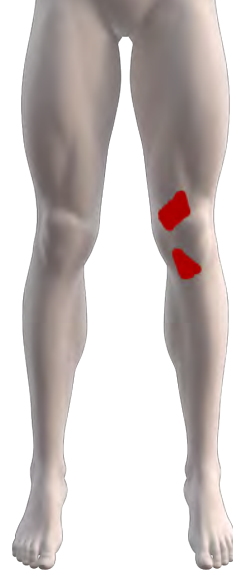

(f) Subject ID: 258

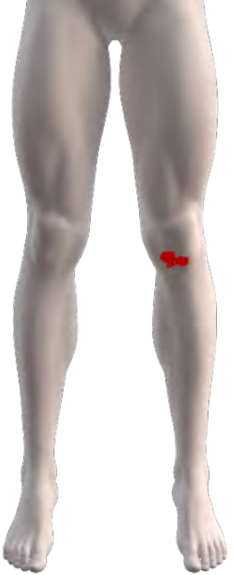

(g) Subject ID: 259

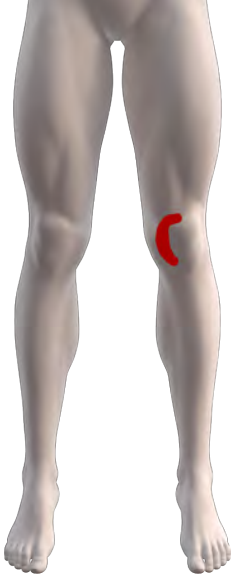

(h) Subject ID: 260

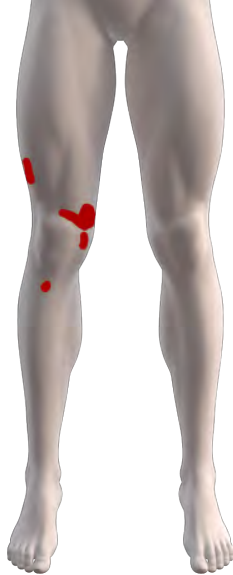

(i) Subject ID: 261

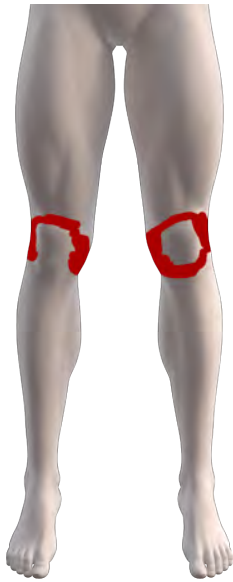

(a) Subject ID: 262

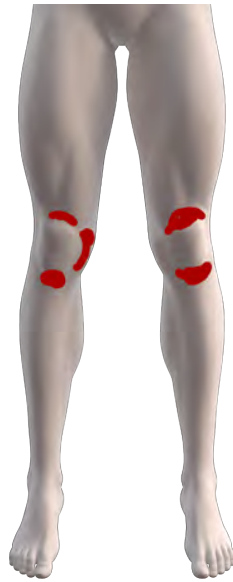

(b) Subject ID: 263

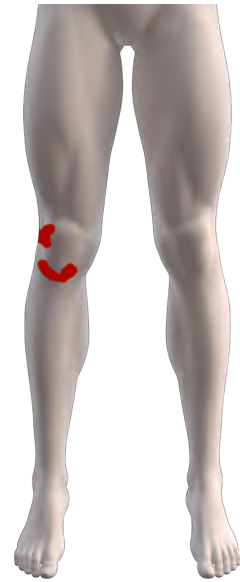

(c) Subject ID: 264

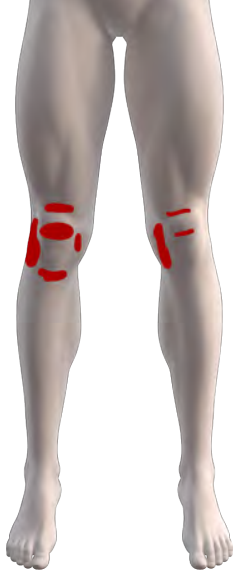

(d) Subject ID: 265

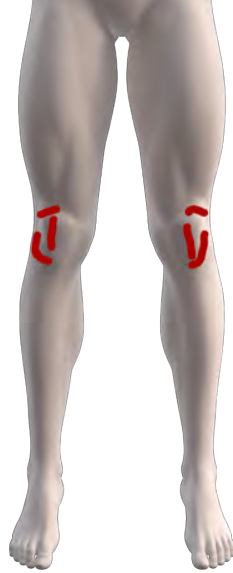

(e) Subject ID: 266

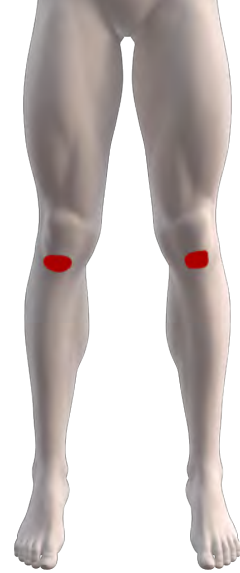

(f) Subject ID: 267

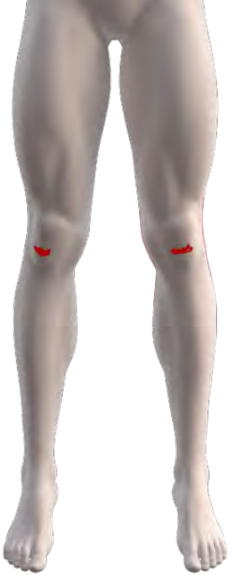

(g) Subject ID: 268

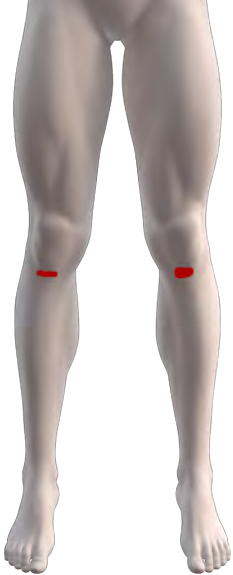

(h) Subject ID: 269

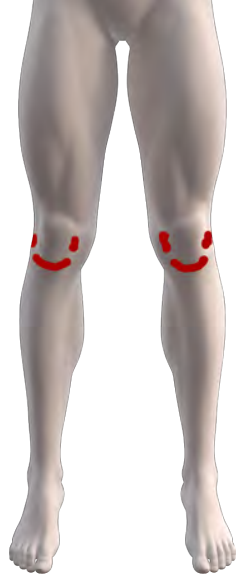

(i) Subject ID: 270

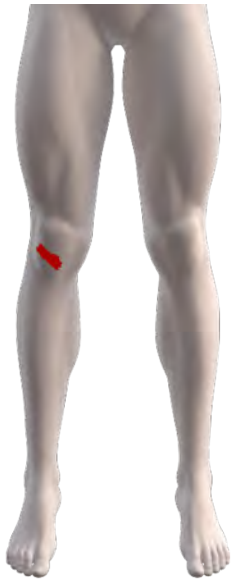

(a) Subject ID: 271

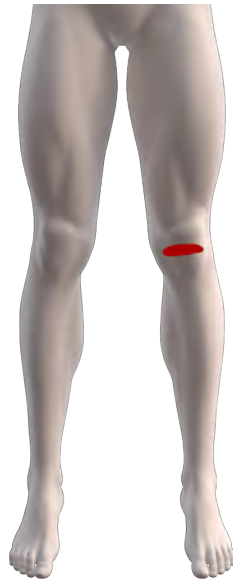

(b) Subject ID: 272

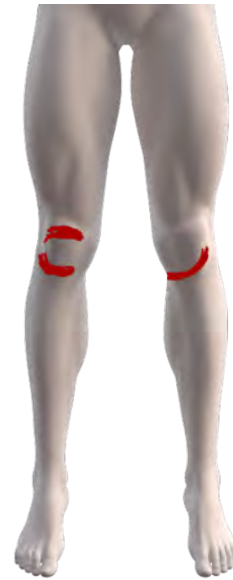

(c) Subject ID: 273

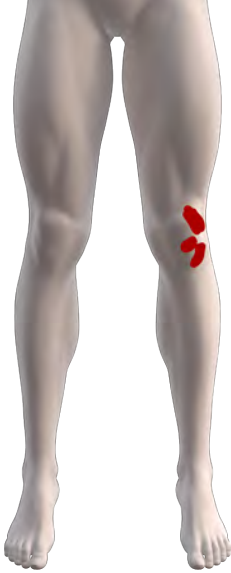

(d) Subject ID: 274

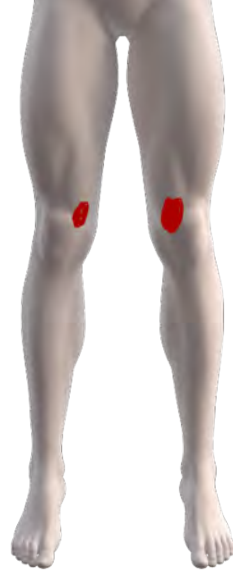

(e) Subject ID: 275

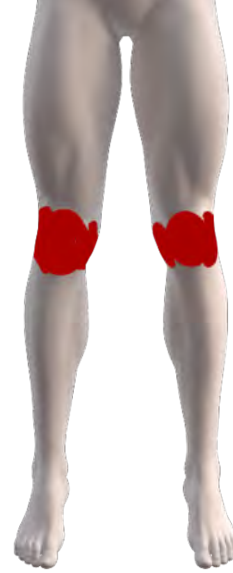

(f) Subject ID: 276

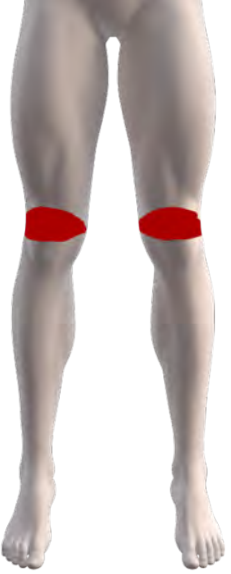

(g) Subject ID: 277

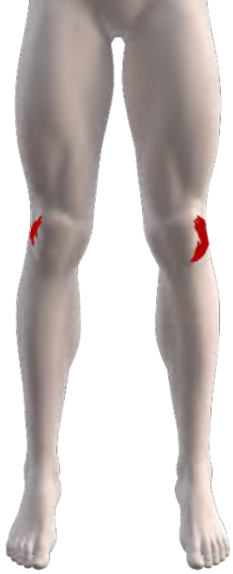

(h) Subject ID: 278

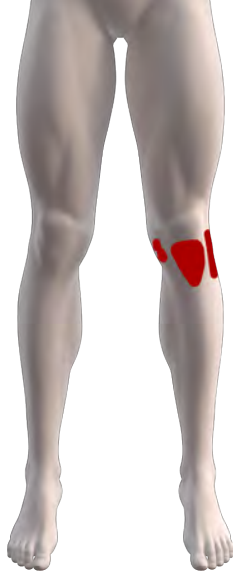

(i) Subject ID: 279

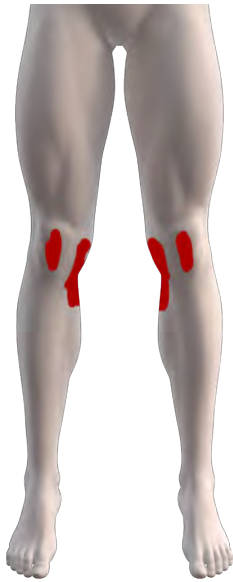

(a) Subject ID: 280

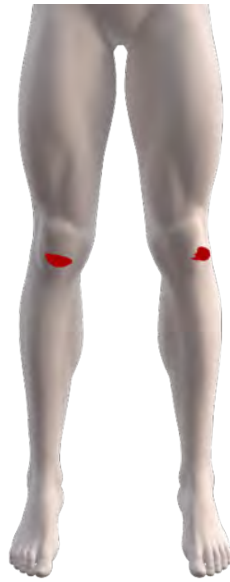

(b) Subject ID: 281

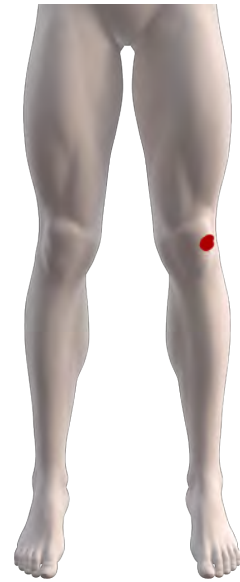

(c) Subject ID: 282

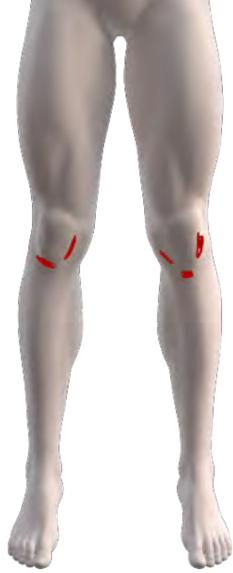

(d) Subject ID: 283

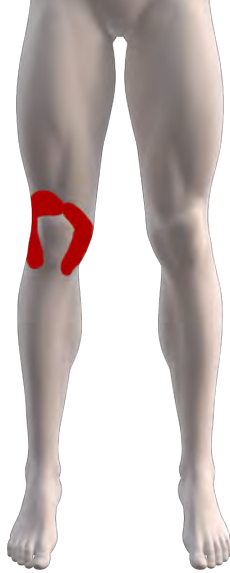

(e) Subject ID: 284

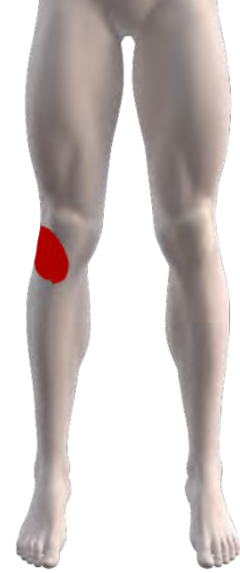

(f) Subject ID: 285

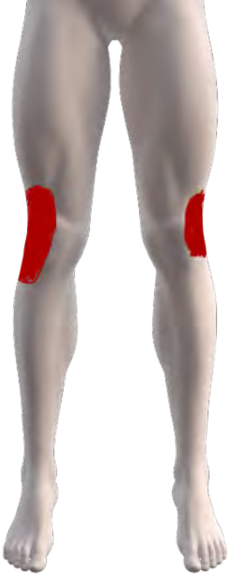

(g) Subject ID: 286

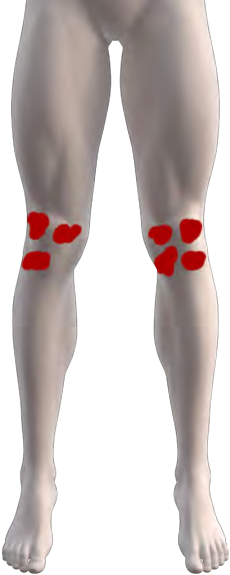

(h) Subject ID: 287

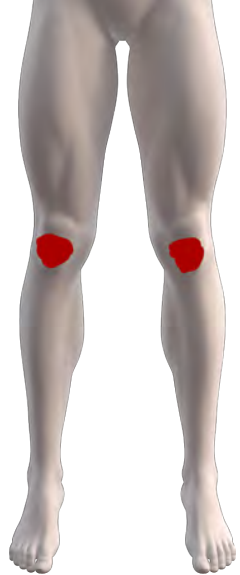

(i) Subject ID: 288

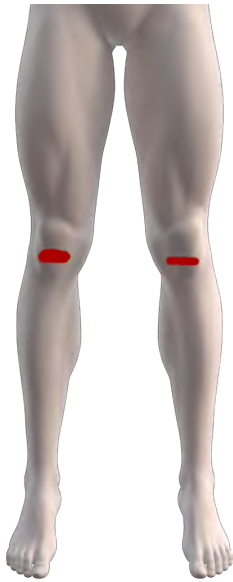

*(a) Subject ID: 289*

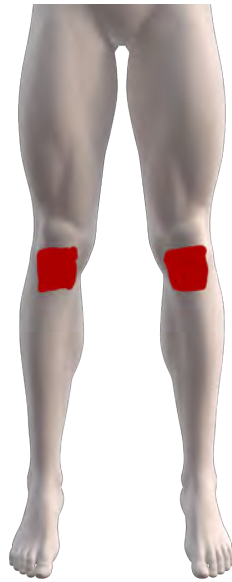

*(b) Subject ID: 290*

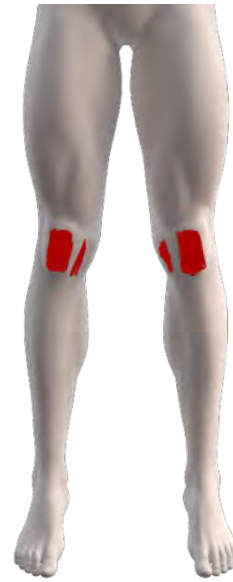

*(c) Subject ID: 291*

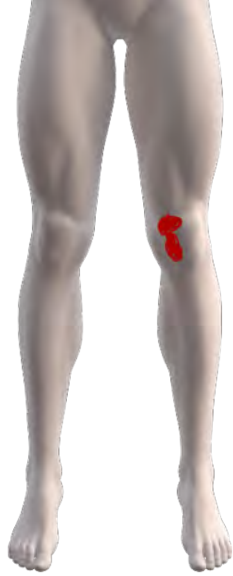

*(d) Subject ID: 292*

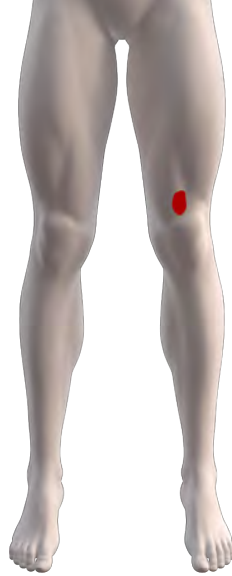

*(e) Subject ID: 293*

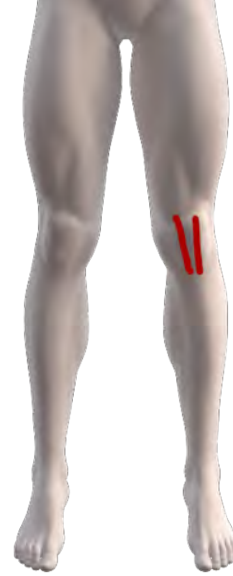

*(f) Subject ID: 294*

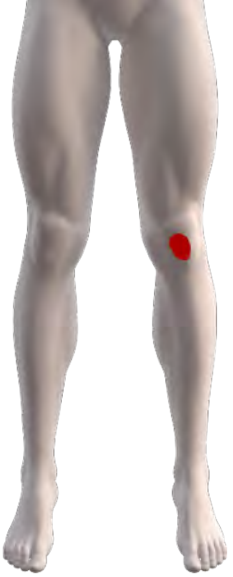

*(g) Subject ID: 295*

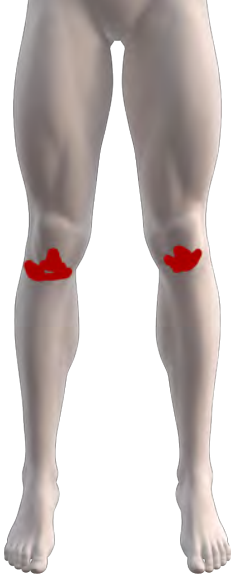

*(h) Subject ID: 296*

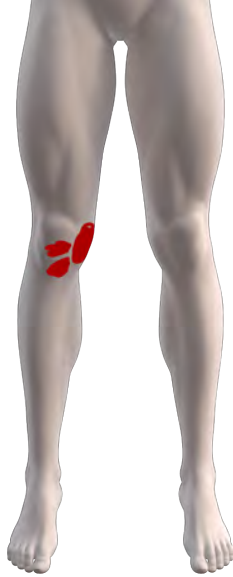

*(i) Subject ID: 297*

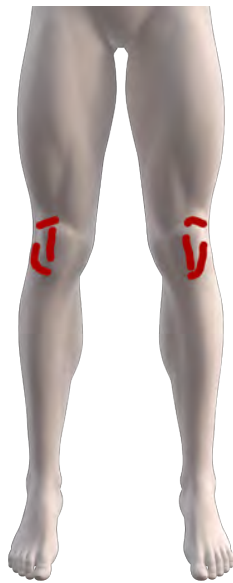

*(a) Subject ID: 298*

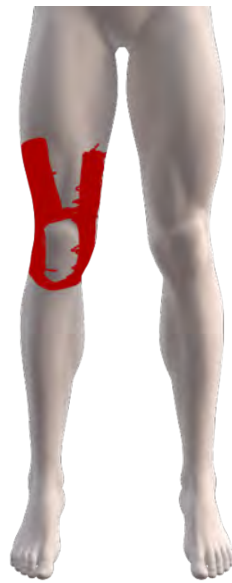

*(b) Subject ID: 299*
